1 **Targeting serine hydroxymethyltransferases 1 and 2 for T-cell acute lymphoblastic**  
2 **leukemia therapy.**

3 Yana Pikman<sup>1</sup>, Nicole Ocasio-Martinez<sup>1</sup>, Gabriela Alexe<sup>1,2,3</sup>, Samuel Kitara<sup>1</sup>, Frances F. Diehl<sup>4</sup>,  
4 Amanda L. Robichaud<sup>1</sup>, Amy Saur Conway<sup>1</sup>, Angela Su<sup>5</sup>, Jun Qi<sup>6</sup>, Giovanni Roti<sup>7</sup>, Caroline A.  
5 Lewis<sup>8</sup>, Alexandre Puissant<sup>5</sup>, Matthew G. Vander Heiden<sup>2,4,9</sup>, Kimberly Stegmaier<sup>1,2</sup>

6

7

8 1. Department of Pediatric Oncology, Dana-Farber Cancer Institute, and Division of  
9 Hematology/Oncology, Boston Children's Hospital, Boston, MA, USA

10 2. Broad Institute of Massachusetts Institute of Technology and Harvard University, Cambridge,  
11 MA, USA

12 3. Graduate Program in Bioinformatics, Boston University, Boston, MA, USA

13 4. Koch Institute for Integrative Cancer Research at Massachusetts Institute of Technology,  
14 Massachusetts Institute of Technology, Cambridge, MA, USA

15 5. INSERM UMR 944, IRSL, St Louis Hospital, Paris, France

16 6. Division of Cancer Biology, Dana-Farber Cancer Institute, Boston, MA, USA.

17 7. Department of Medicine and Surgery, University of Parma, Parma, Italy

18 8. Whitehead Institute for Biomedical Research, Massachusetts Institute of Technology,  
19 Cambridge, MA, 02142, USA

20 9. Department of Medical Oncology, Dana-Farber Cancer Institute, Boston, MA, USA

21

22

23

24

25

26

27

28

29 Corresponding Author:

30 Kimberly Stegmaier, M.D.

31 450 Brookline Avenue, Boston, MA 02215

32 phone: 617-632-4438

33 fax: 617-632-4850

34 email: kimberly\_stegmaier@dfci.harvard.edu

35

36

37 **Abbreviations used:** T-ALL, T-cell acute lymphoblastic leukemia; B-ALL, B-cell acute  
38 lymphoblastic leukemia; AML, acute myeloid leukemia; DHFR, dihydrofolate reductase; ALL,  
39 acute lymphoblastic leukemia; MTHFD2, methylenetetrahydrofolate dehydrogenase-  
40 cyclohydrolase 2; KEGG, Kyoto Encyclopedia of Genes and Genomes; GSEA, Gene Set  
41 Enrichment Analysis; SHMT1, serine hydroxymethyltransferase 1; SHMT2, serine  
42 hydroxymethyltransferase 2; MTHFD1L, methylene tetrahydrofolate dehydrogenase 1-like; LC-  
43 MS, liquid chromatography-mass spectrometry.

44

45

46

47

48

49

50

51

52

53 **Abstract**

54 Despite progress in the treatment of acute lymphoblastic leukemia (ALL), T-cell ALL (T-ALL)  
55 has limited treatment options particularly in the setting of relapsed/refractory disease. Using an  
56 unbiased genome-scale CRISPR-Cas9 screen we sought to identify pathway dependencies for  
57 T-ALL which could be harnessed for therapy development. Disruption of the one-carbon folate,  
58 purine and pyrimidine pathways scored as the top metabolic pathways required for T-ALL  
59 proliferation. We used a recently developed inhibitor of SHMT1 and SHMT2, RZ-2994, to  
60 characterize the effect of inhibiting these enzymes of the one-carbon folate pathway in T-ALL  
61 and found that T-ALL cell lines were differentially sensitive to RZ-2994, with a S/G2 cell cycle  
62 arrest. The effects of SHMT1/2 inhibition were rescued by formate supplementation. Loss of  
63 both SHMT1 and SHMT2 was necessary for impaired growth and cell cycle arrest, with  
64 suppression of both SHMT1 and SHMT2 impairing leukemia progression *in vivo*. RZ-2994  
65 decreased leukemia burden *in vivo* and remained effective in the setting of methotrexate  
66 resistance *in vitro*. This study highlights the significance of the one-carbon folate pathway in T-  
67 ALL and supports further development of SHMT inhibitors for treatment of T-ALL and other  
68 cancers.

69

70

71 **Introduction**

72 Metabolic reprogramming is a hallmark of cancer, as cells alter their metabolism to  
73 support rapid cell growth and proliferation. As early as the 1920s, Otto Warburg observed that  
74 tumor cells consume glucose at a high rate and do fermentation even in the presence of  
75 oxygen<sup>1</sup>. Since then drugs targeting metabolism transformed the treatment of certain cancers. In  
76 the 1940s, the discovery and application of aminopterin, which was found later to target  
77 dihydrofolate reductase (DHFR), a cytoplasmic enzyme involved in one-carbon folate  
78 metabolism, yielded the first remission in a child with acute lymphoblastic leukemia (ALL)<sup>2</sup>.

79 Other folate derivatives, such as methotrexate, were later developed. More recently, drugs such  
80 as 5-fluorouracil and pemetrexed that target thymidylate synthetase, another enzyme that  
81 utilizes folate-derived one-carbon units, were found to be effective therapies for some cancers<sup>3</sup>.

82 T-cell acute lymphoblastic leukemia (T-ALL) is a highly aggressive cancer characterized  
83 by rapid proliferation of early lymphoid cells with immature T-cell surface markers. Early T-cell  
84 precursors express the NOTCH1 receptor and rely on high levels of NOTCH1 ligand  $\Delta$ -like 4  
85 expressed on the surface of thymic epithelial cells during T-cell development<sup>4,5</sup>. High NOTCH1  
86 signaling and expression of the NOTCH1 receptor are thus instructive toward T-cell lineage  
87 development. As T-cells progress through thymic development, T cell receptor (TCR)  
88 rearrangements are highly coordinated with NOTCH1 signaling and times of rapid cell  
89 proliferation in the thymus. Moreover, T-cell activation and development rely on a number of  
90 other coordinated pathways including one-carbon folate and specialized mitochondrial  
91 proliferation<sup>6</sup>. T-ALL originates as a result of accumulation of mutations that affect cell growth,  
92 proliferation and differentiation during this highly coordinated proliferative process. Over 70% of  
93 T-ALL, for example, have mutations affecting *NOTCH1* or the NOTCH1 signaling pathway, such  
94 as *FBXW7*, highlighting the early normal proliferative signal gone awry<sup>7</sup>.

95 In addition to NOTCH1, MYC signaling is essential for T-ALL pathogenesis, and MYC is  
96 activated by NOTCH in this disease<sup>8</sup>. MYC is a master regulator of cell proliferation, affecting  
97 regulation of immortality, cell cycle progression, genetic instability, apoptosis and metabolism<sup>9</sup>.  
98 In cancer, pathologic activation of MYC commonly plays a key role in disease pathogenesis.  
99 MYC stimulates expression of many mitochondrial genes that are encoded in the nucleus and  
100 even regulates mitochondrial biogenesis itself<sup>10</sup>. MYC has been implicated in controlling the  
101 one-carbon folate pathway, especially in the presence of hypoxia<sup>11,12</sup>. In the context of acute  
102 myeloid leukemia (AML), we have previously shown that MYC binds at promoter sites of  
103 enzymes of the one-carbon folate pathway, such as SHMT2, MTHFD2 and MTHFD1L<sup>13</sup>.

104 While cure rates for pediatric ALL have improved dramatically over the last several  
105 decades, leukemia remains the second leading cause of cancer-related death in children<sup>14</sup>.  
106 Adult patients with ALL continue to have poor prognosis even with intensive therapy. T-ALL,  
107 comprising 15-20% of ALL, is associated with early relapses and is more likely to be refractory  
108 to treatment in the relapse setting<sup>15,16</sup>. Moreover, while there is excitement surrounding immune-  
109 mediated therapies for B-cell acute lymphoblastic leukemia (B-ALL), including antibody-based  
110 approaches and CAR T-cell therapies, these approaches are not available for patients with T-  
111 ALL. Thus, more effective therapies are needed for patients with T-ALL, particularly those with  
112 relapsed or refractory disease.

113 Given the role of the one-carbon folate pathway in cancer there is an interest in  
114 developing novel inhibitors of this pathway. Inhibition of the one-carbon folate pathway has  
115 already yielded a number of highly active drugs, such as methotrexate (targeting DHFR), 5-  
116 fluorouracil and pemetrexed (targeting thymidylate synthetase and DHFR), gemcitabine (a  
117 deoxycytidine analog), and mercaptopurine (a PRPP aminotransferase inhibitor inhibiting purine  
118 nucleotide synthesis). Over the last several years, there has been an increase in the  
119 development of inhibitors of the de novo purine and pyrimidine synthesis pathways, with drugs  
120 such as DHODH inhibitors showing promise in early phase clinical trials<sup>17</sup>. Inhibitors of  
121 plasmodial serine hydroxymethyltransferase (SHMT) have been developed for malaria  
122 treatment. These pyrazolopyran-based ligands have been optimized for *in vitro* activity against  
123 SHMT enzymes, though with limited *in vivo* activity<sup>18</sup>. Further optimization for SHMT activity has  
124 led to an *in vitro* selective SHMT1/2 inhibitor, though this has not been tested *in vivo*<sup>19</sup>.

125 Given the clinical need for the treatment of T-ALL, we used an unbiased CRISPR-Cas9  
126 genome-scale screen to identify specific pathway dependencies for T-ALL. The one-carbon  
127 folate, purine and pyrimidine pathways scored as the top metabolic pathways in this analysis.  
128 Using a combination of small molecule inhibitors and genetic suppression of SHMT, we validate  
129 the combined repression of SHMT1 and SHMT2 as a candidate therapeutic approach for T-ALL.

130

131

## 132 **Methods**

### 133 **Cell Culture, Cell Viability and Flow Cytometry Assays**

134 PF382, RPMI8402, KOPTK1 and HSB2 cell lines were obtained from Dr. Jon Aster, and identity  
135 verified using STR profiling. All cell lines were maintained in RPMI 1640 (Cellgro) supplemented  
136 with 1% penicillin/streptomycin (PS)(Cellgro) and 10% FBS (Sigma-Aldrich) at 37°C with 5%  
137 CO<sub>2</sub>. Viability was evaluated using the CellTiter-Glo Luminescent Cell Viability Assay (Promega)  
138 after the indicated days of exposure to the specific drug or combination of drugs. Luminescence  
139 was measured using FLUOstar Omega from BMG Labtech. The IC<sub>50</sub> values were determined  
140 using Prism GraphPad version 8 software.

141 For cell cycle analysis, T-ALL cells were harvested at the indicated time points, washed  
142 and fixed in ethanol and then re-suspended in 49 µg/mL propidium iodide (Sigma-Aldrich) and  
143 100 µg/mL of RNase A (Qiagen). Cell death was assessed using flow cytometric analysis of  
144 Annexin V and propidium iodide staining according to the manufacturer's instructions  
145 (eBioscience). Samples were analyzed on a FACSCanto analyzer (BD Biosciences). Data  
146 analysis was completed using Flowjo software.

147

## 148 **Compounds**

149 RZ-2994 was initially obtained from Raze Therapeutics. After the structure was published<sup>6</sup> and  
150 Raze Therapeutics was no longer producing it, RZ-2994 was synthesized by Medicilon. Identity  
151 was confirmed independently by LC-MS and NMR performed by Dr. Jun Qi (DFCI).  
152 Methotrexate was purchased from Sigma Aldrich.

153

## 154 **CRISPR-Cas9 Screening**

155 The CRISPR-Cas9 screen was performed on the Avana library containing 73,372 guides for  
156 18,333 genes, with an average of 4 guides per gene. The analysis was done on the 19Q4  
157 version of the gene effect Avana data processed with the CERES algorithm<sup>20</sup>, publicly available  
158 on the Depmap portal <https://depmap.org/portal/>. This dataset contains 689 cell lines, including  
159 3 T-cell ALL lines: KOPTK1, PF382 and HSB2, and 73 other hematopoietic cell lines.

160 Initially, cancer cell lines were transduced with Cas9 using a lentiviral system. Cell lines  
161 that met quality criteria, including acceptable Cas9 measured ability to knockout transduced  
162 GFP, appropriate growth properties and other parameters, were then screened with the Avana  
163 library. A pool of guides was transduced into a population of cells. The cells were cultured for 21  
164 days *in vitro*, and at the end of the assay, barcodes for each guide were sequenced for each cell  
165 line in replicate.

166 The sgRNA read count data were deconvoluted from sequence reads by using the  
167 PoolQ public software (<https://portals.broadinstitute.org/gpp/public/software/poolq>). A series of  
168 quality control pre-processing steps was performed to remove samples with poor replicate  
169 reproducibility, as well as guides that have low representation in the initial plasmid pool, as  
170 described by Dempster et al<sup>21</sup>. The raw read counts were summed up by replicate and guide  
171 and the log<sub>2</sub>-fold-change from pDNA counts for each replicate was computed. The sgRNAs with  
172 suspected off-target activity and the guides with pDNA counts less than one millionth of the  
173 pDNA pool were removed. The replicates that failed fingerprinting and the replicates with less  
174 than 15 million reads were removed and then the replicate read counts were scaled to 1 million  
175 total reads per replicate. The replicates with the null-normalized mean difference (NNMD)  
176 greater than -1.0 were filtered out. Also removed were those replicates that did not have a  
177 sufficiently high Pearson coefficient (> 0.61) with at least one other replicate for the line when  
178 looking at genes with the highest variance (top 3%) in gene effect across cell lines. Then NNMD  
179 was computed again for each cell line after averaging remaining replicates, and the cell lines  
180 with NNMD > -1.0 were filtered out.

181 For quality control and normalization, exogenously defined nonessential genes<sup>22</sup> were  
182 used as negative controls, and common essential genes<sup>23,24</sup> were used as positive controls. The  
183 gene level dependency scores were inferred by running the computational tool CERES<sup>20</sup>.  
184 CERES was developed to computationally correct the copy-number effect and to infer true  
185 underlying effect of gene knockout. CERES models the observed normalized log-fold change for  
186 each sgRNA and cell line as the linear combination of gene-knockout and copy-number effects  
187 with coefficients giving the guide activities. Copy-number effects are fit with a linear piece-wise  
188 model in each cell line. Once all parameters have been fit, the inferred gene scores and guide  
189 activity scores are extracted and reported.

190 The CERES gene dependency data was further scaled to the -1 value of the median of  
191 common essential genes in each cell line, and then transformed into z-scores so that each gene  
192 had mean = 0 and variance = 1. Next the first five principal components of the resulting data  
193 were removed, the prior means of genes were restored, and the data were scaled again so the  
194 median of common essentials in each cell lines was -1. The pan-dependent genes were  
195 identified as those genes for whom 90% of cell lines rank the gene above a dependency cutoff  
196 determined from the central minimum in a histogram of gene ranks in their 90th percentile least  
197 dependent line. For each CERES gene score, the probability that the score represents a true  
198 dependency or not was inferred based on the expectation-maximization algorithm.

199 The differential dependency gene level scores for the T-ALL lineage were determined for  
200 T-ALL vs. all other non T-ALL cell lines, and also for T-ALL vs. all other non T-ALL  
201 hematopoietic cell lines, in order to eliminate the bias induced by the hematopoietic lineage  
202 itself. The analysis was performed based on the empirical Bayes (eBayes) statistics available  
203 from the limma package<sup>25</sup> (Bioconductor v3.10  
204 <https://www.bioconductor.org/packages/release/bioc/html/limma.html>) with the significance  
205 cutoffs:  $\text{abs}(\text{size effect}) \geq 0.3$ ,  $P\text{-value} \leq 0.05$ , adjusted  $P\text{-value} \leq 0.10$ .

206



## 207 **Vectors and Constructs**

208 shRNA constructs targeting SHMT1 and SHMT2 were designed and delivered via a LT3 GEPIR  
209 (SHMT1) or REVIR(SHMT2) vector as previously described<sup>26</sup>. Hairpin sequences are listed in  
210 Supplementary Table 1. For virus production, 12 µg of the above vector with 6 µg pCMV8.9 and  
211 pCMV-VSVG packaging vectors were transfected into the 293 packaging cell line using X-  
212 tremeGENE 9 (Roche), and the resulting viral supernatants were harvested as previously  
213 described<sup>13</sup>. sgRNA constructs were designed using the Broad Institute's shRNA designer tool;  
214 sequences are listed in Supplementary Table 1.

215

## 216 **RNASeq**

217 KOPTK1 cells were grown in the presence of 2 µM RZ-2994 vs DMSO and cells collected at 24  
218 and 72 hours of treatment. Three samples were collected per treatment condition per time point.  
219 RNA was extracted from cells with an RNeasy Kit (Qiagen) and was sequenced using Illumina  
220 TruSeq strand specific library. Quality control tests for the 75 bp single-end mapped reads were  
221 performed using the FASTQC software ([www.bioinformatics.babraham.ac.uk/projects/fastqc/](http://www.bioinformatics.babraham.ac.uk/projects/fastqc/)).  
222 The reads were aligned to the GRCh37/hg19 human genes by using STAR v2.7-2b<sup>27</sup>. Quality  
223 control tests for the aligned reads and for replicate consistency were performed by using the  
224 qualimap v2.2.1<sup>28</sup> and the SARTools<sup>29</sup> pipelines. The RNA-Seq data for this study is available  
225 for download from the Gene Expression Omnibus (GEO) repository  
226 <https://www.ncbi.nlm.nih.gov/geo/> (GSE143176) upon manuscript publication.

227 Gene level reads and gene level expression estimated as  $\log_2(1+TPM)$  scores – where  
228 TPM stands for Transcripts Per Million - were computed using the Feature Counts method  
229 implemented in the Bioconductor v3.10 RSubread package<sup>30</sup>. The overall significance of the  
230 differential expression between the control (DMSO) and treatment (RZ-2994) phenotypes at  
231 Day 1 and separately at Day 3, was estimated by using the apegglm method<sup>31</sup> available from the

232 DESeq2 library<sup>32</sup> (Bioconductor v3.10) with the standard significance cut-offs  $\text{abs}(\text{shrinkage fold}$   
233  $\text{change}) \geq 1.5$ , adjusted P-value  $\leq 0.10$ .

234

### 235 **Gene Set Enrichment Analysis (GSEA) for T-ALL Dependencies**

236 The GSEA v4.0.3 software<sup>33,34</sup> was utilized to identify the Kyoto Encyclopedia of Genes and  
237 Genomes (KEGG) canonical pathways that have a significant overlap with the genes showing a  
238 differential dependency for the T-ALL vs. non T-ALL cell lines and separately, for the T-ALL vs.  
239 non T-ALL hematopoietic cell lines in the Avana 19Q4 dependency data. First, the hg19 genes  
240 were ranked in decreasing order based on the T-ALL differential dependency scores. The goal  
241 of GSEA was to identify the pathways that are distributed at the top or at the bottom of the  
242 ranked list of genes. For this purpose, the Pre-Rank GSEA module was run across the  
243 collection of 186 KEGG pathways available in the MSigDB v7.0 database<sup>33,35,36</sup> with the  
244 significance cut-offs nominal P-value  $\leq 0.10$  and FDR  $\leq 0.25$  for the Kolmogorov-Smirnov  
245 enrichment test. The significantly enriched pathways with the Normalized Enrichment Score  
246 (NES)  $\leq -1.5$  were annotated for “Depletion” in T-ALL and those with NES  $\geq 1.5$  were annotated  
247 for “Proliferation” in T-ALL. The KEGG pathways identified as significantly enriched in  
248 dependency genes for T-ALL were further manually annotated as related to the amino-acid  
249 metabolic functional category.

250

### 251 **Single-sample Gene Set Enrichment Analysis for T-ALL Dependencies**

252 A single-sample GSEA (ssGSEA) analysis<sup>37,38</sup> was performed on the CERES dependency data  
253 across the collection of 186 KEGG pathways available from the MSigDB v7.0 database to  
254 further analyze the functional association of the amino-acid metabolic pathways with T-ALL  
255 dependencies.

256 ssGSEA is a variant of the GSEA method that assigns to each individual sample,  
257 represented as a ranked list of genes, an Enrichment Score (ES) with respect to each gene set

258 in a given collection of pathways. The ssGSEA ES is calculated as a running sum statistic by  
259 walking down across the ranked list of genes, increasing the sum when encountering genes in  
260 the gene set and decreasing it when encountering genes not in the gene set. The significance of  
261 the ES is estimated based on a permutation P-value and adjusted for multiple hypotheses  
262 testing through FDR. A positive ES denotes a significant overlap of the signature gene set with  
263 groups of genes at the top of the ranked list, while a negative ES denotes a significant overlap  
264 of the signature gene set with groups of genes at the bottom of the ranked list.

265 For each sample, the ES is further transformed into a Z-score by subtracting the average  
266 of the ES's assigned to all other samples and by dividing the result to their standard deviation.  
267 While GSEA generates a gene set's enrichment score with respect to phenotypic differences  
268 across a collection of samples within a dataset, ssGSEA calculates a separate enrichment  
269 score for each pairing of sample and gene set, independent of phenotype labeling. In this  
270 manner, ssGSEA transforms a single sample's dependency profile to a gene set enrichment  
271 profile. A gene set's enrichment score represents the activity level of the biological process in  
272 which the gene set's members are coordinately scoring up or down. The ssGSEA gene set  
273 representation has an unsupervised biological interpretability and can be further analyzed with  
274 statistical and machine learning methods.

275

## 276 **Metabolite Profiling and Analysis**

277 For metabolite extraction, 1 million cells per condition were pelleted and washed with ice cold  
278 saline. Cell pellets were resuspended in 1 mL of 80% methanol solution containing 500 nM  
279 internal standards (Metabolomics Amino Acid Mix, Cambridge Isotope Laboratories Inc.).  
280 Samples were vortexed at 4 degrees, followed by centrifugation at 4C for 10 minutes.  
281 Supernatant was transferred to a new tube, and samples dried using a Speedvac. Samples  
282 were collected in triplicate.

283 Dried cell extracts were resuspended in 50  $\mu$ L HPLC grade water. LC-MS analysis was  
284 performed using a QExactive orbitrap mass spectrometer using an Ion Max source and heated  
285 electro-spray ionization (HESI) probe coupled to a Dionex Ultimate 3000 UPLC system (Thermo  
286 Fisher Scientific). External mass calibration was performed every 7 days. Typically, samples  
287 were separated by chromatography by injecting 2  $\mu$ L of sample on a SeQuant ZIC-pHILIC 2.1  
288 mm x 150 mm (5  $\mu$ m particle size) column. Samples were run at multiple dilutions to ensure  
289 linearity of all metabolites measured. Flow rate was set to 150 mL/min. and temperatures were  
290 set to 25C for the column compartment and 4C for the autosampler tray. Mobile phase A was 20  
291 mM ammonium carbonate, 0.1% ammonium hydroxide. Mobile phase B was 100% acetonitrile.  
292 The chromatographic gradient was: 0–20 min.: linear gradient from 80% to 20% mobile phase  
293 B; 20–20.5 min.: linear gradient from 20% to 80% mobile phase B; 20.5 to 28 min.: hold at 80%  
294 mobile phase B. The mass spectrometer was operated in full scan, polarity-switching mode and  
295 the spray voltage was set to 3.0 kV, the heated capillary held at 275C, and the HESI probe was  
296 held at 350C. The sheath gas flow rate was 40 units, the auxiliary gas flow was 15 units and the  
297 sweep gas flow was one unit. The MS data acquisition was performed in a range of 70–1000  
298 m/z, and an additional narrow-range scan (220-700 m/z) was included in negative mode to  
299 enhance the detection of nucleotides. The resolution was set at 70,000, the AGC target at  
300  $1 \times 10^6$ , and the maximum injection time at 20 msec. Relative quantitation of polar metabolites  
301 was performed with TraceFinder 4.1™ (Thermo Fisher Scientific) using a 5 ppm mass tolerance  
302 and referencing an in-house library of chemical standards. Peak areas were normalized to  
303 internal standards and cell number.

304

305

306 **Immunoblotting**

307 Cells were lysed in Cell Signaling Lysis Buffer (Cell Signaling Technology) as previously  
308 reported<sup>13</sup> and resolved by gel electrophoresis using Novex 4-12% Bis-Tris Gels (Invitrogen),  
309 transferred to a nitrocellulose membrane (Bio-Rad) and blocked for one hour in 5% BSA  
310 (Sigma). Blots were incubated in primary antibody to SHMT1 (Cell Signaling, #80715), SHMT2  
311 (Cell Signaling, #12762) or Vinculin (Cell Signaling, #13901), followed by the secondary  
312 antibodies anti-rabbit HRP (Amersham) or anti-mouse HRP (Amersham). Bound antibody was  
313 detected using the Western Lightning Chemiluminescence Reagent (Perkin Elmer).

314

### 315 ***In Vivo Studies***

316 For genetic inhibition studies, RPMI8402 cells were infected with lentivirus targeting renilla  
317 (CTL), SHMT1, SHMT2 or the combination, and cells selected. 750,000 cells were injected via  
318 the tail vein into 8-week-old, female NSG mice (The Jackson Laboratory). Disease burden was  
319 followed using peripheral blood hCD45. At the time of disease detection of at least 1% human  
320 cells, mice were switched to receive doxycycline 2000 ppm chow. Mice were treated for 9 days  
321 prior to disease assessment.

322 For the RZ-2994 therapeutic study, 500,000 cells RPMI8402 luciferized cells were  
323 injected via the tail vein into 8-week-old, female NSG mice (The Jackson Laboratory). Leukemia  
324 burden was assessed using non-invasive bioluminescence imaging by injecting mice  
325 intraperitoneally with 75 mg/kg d-Luciferin (Promega), anesthetizing them with 2–3% isoflurane,  
326 and imaging them on an IVIS Spectrum (Caliper Life Sciences). A standardized region of  
327 interest (ROI) encompassing the entire mouse was used to determine total body  
328 bioluminescence, with data expressed as photons/s/ROI (ph/s/ROI). Once detectable  
329 bioluminescence was achieved, the mice were separated into two treatment cohorts (RZ-2994  
330 and vehicle), 7 mice per cohort and treatment initiated. Mice were treated with RZ-2994 at 100  
331 mg/kg IP daily for 14 days. There was no blinding of the person treating the mice to the  
332 treatment. Sample size was calculated to have 80% power to detect 1.75 SD difference

333 between the two groups using a two-sided t-test with  $\alpha = 0.05$ . All animal studies were  
334 conducted under the auspices of protocols approved by the Dana-Farber Cancer Institute  
335 Animal Care and Use Committee.

336

### 337 **Drug Interaction Analysis**

338 The expected dose-inhibitory fraction relationships for the combination therapy of RZ-2994 and  
339 methotrexate were assessed using the Bliss independence model<sup>39,40</sup>. The Bliss  
340 Independence model is based on the principle that drug effects are outcomes of probabilistic  
341 processes and compares the effect resulting from the combination of two drugs directly to the  
342 effects of its individual components. The model computes a quantitative measure called excess  
343 over Bliss (*eob*). Positive *eob* values are indicative of synergistic interaction whereas negative  
344 *eob* values are indicative of antagonistic behavior. Null *eob* values indicate additive effect.

345

346

### 347 **Statistical Analysis**

348 Statistical significance was determined by two-tailed t test or Mann-Whitney test for pair-wise  
349 comparison of groups, as indicated. Statistical calculations were performed using Prism  
350 GraphPad version 8 software.

351

## 352 **Results**

### 353 **One-carbon folate metabolism is a dependency in T-ALL.**

354 To identify selective pathway dependencies for T-ALL we used CRISPR-Cas9 whole  
355 genome screening data of 689 cancer cell lines from the Broad Institute Dependency Map  
356 project<sup>41</sup>. Three T-ALL cell lines were included in the screen, in addition to 73 other  
357 hematopoietic cell lines and 613 cell lines derived from solid tumors. Gene set enrichment  
358 analysis (GSEA) was performed against 186 KEGG pathways to identify top negatively enriched

359 pathways for T-ALL compared to other cancers. Inhibition of these pathways would be predicted  
360 to be more therapeutically effective in T-ALL compared to other tumors. The one-carbon folate,  
361 purine and pyrimidine KEGG pathways scored among the top dependencies in T-ALL versus all  
362 other cancer cell lines (Fig. 1A) and when compared to other hematopoietic cell lines (Fig. 1B).  
363 As a positive control, known T-ALL pathway dependencies, such as NOTCH signaling and T-  
364 cell receptor signaling, were also among the top 10 KEGG scoring pathways (Supplementary  
365 Tables 2A and 2B). Focusing on these pathways separately, each was a significant dependency  
366 in T-ALL (Fig.1C and Supplementary Fig. 1). To further validate this finding in a primary T-ALL  
367 dataset, we performed single sample GSEA (ssGSEA) on a large human primary ALL gene  
368 expression data set (St. Jude, 575 ALL samples, including 84 T-ALL samples<sup>42</sup>) for enrichment  
369 across the collection of 186 canonical KEGG pathways. T-ALL samples showed significantly  
370 increased expression of genes involved in the one-carbon folate, purine and pyrimidine  
371 metabolism pathways, compared to B-ALL samples in this data set (Fig. 1D). We validated this  
372 finding in a second gene expression data set with 107 primary ALL samples, including 15 T-ALL  
373 samples (GSE13351, Supplementary Fig. 2A)<sup>43</sup>. Both data sets showed a significant enrichment  
374 of the one-carbon folate pathway associated with the T-ALL vs. other non-T-ALL samples ( $P \leq$   
375 0.0001, Supplementary Fig. 2B and 2C).

376 Inhibitors of the one-carbon folate pathway, such as methotrexate and mercaptopurine,  
377 have formed the backbone of ALL therapy. Given the selective dependency on the one-carbon  
378 folate pathway in T-ALL, we tested RZ-2994<sup>6</sup> (also known as SHIN1<sup>19</sup>) as a novel inhibitor of  
379 this pathway. RZ-2994 is an inhibitor of the cytoplasmic SHMT1 and mitochondrial SHMT2  
380 serine hydroxymethyltransferases<sup>19,44</sup>. For comparison to other hematopoietic cell lines, we  
381 tested AML, B-ALL and T-ALL cells for sensitivity to RZ-2994. T-ALL was sensitive to RZ-2994  
382 compared to other acute leukemia cell lines, with an average  $IC_{50}$  of 1.6  $\mu$ M (Fig. 2A). Treatment  
383 of 4 T-ALL cell lines resulted in accumulation of cells in the S and G2 cell cycle phases with  
384 minimal apoptosis (Fig. 2B, Supplementary Fig. 3 and Fig. 2C). We next evaluated the effects of

385 SHMT inhibition on gene expression. We treated the KOPTK1 cell line with RZ-2994 for 1 and 3  
386 days and performed RNA sequencing analysis. RZ-2994 treatment resulted in changes in  
387 pathways associated with amino acid metabolism (Fig. 2D and Supplementary Fig. 4A), MYC  
388 targets (Fig. 2E and Supplementary Fig. 4B) and associated with cell cycle arrest (Fig. 2F and  
389 Supplementary Fig. 4C). These changes were more pronounced after 3 days of treatment.

390 Inhibition of SHMT1 and SHMT2 impairs glycine and formate synthesis, which in turn  
391 can impede nucleotide production<sup>19,44</sup>. We performed metabolite profiling of PF382, KOPTK1  
392 and RPMI8402 cell lines treated with RZ-2994 for 3 days and observed changes in  
393 intermediates that involve the one-carbon folate pathway (Supplementary Fig. 5). We focused  
394 on metabolic changes that were common among the three cell lines as those are more likely to  
395 contribute to the RZ-2994-related effect on cell growth. Consistent with SHMT1 and SHMT2  
396 inhibition, we found glycine levels were decreased with an increase in serine levels. We also  
397 observed increases in the purine precursors AICAR and GAR (Fig. 3A), which are upstream of  
398 steps of the purine synthesis where one-carbon units are incorporated. There was also a  
399 decrease in ATP and dTTP. Thymidylate synthase requires 5,10-methylenetetrahydrofolate to  
400 synthesize dTMP from dUMP. Consistent with possible depletion of THF by SHMT1 and  
401 SHMT2 inhibition, there was an increase in dUMP (Fig. 3A). Addition of 1 mM formate rescued  
402 the proliferation of T-ALL cell lines in the presence of RZ-2994 (Fig. 3B), including rescue of the  
403 cell cycle arrest (Fig. 3C). Cells cultured in the presence of formate supplementation were no  
404 longer sensitive to the effects of RZ-2994 (Fig. 3D).

405

#### 406 **Loss of both SHMT1 and SHMT2 is necessary to impair proliferation of T-ALL.**

407 Enzymes of the mitochondrial one-carbon folate pathway are highly expressed in  
408 cancer,<sup>45,46</sup> and their expression has been associated with poor survival<sup>46</sup>. We have previously  
409 shown MTHFD2 and enzymes of the one-carbon folate pathway to be highly expressed in AML,  
410 with inhibition of MTHFD2 leading to a decrease in AML viability *in vitro* and *in vivo*<sup>13</sup>.



411 Redundancy of SHMT1 and SHMT2 enzymes has been shown in HEK293T cells and HCT-116  
412 colon cancer cells, though it is unclear if this occurs in leukemia cells<sup>47</sup>. Given that RZ-2994  
413 inhibits both the cytoplasmic and mitochondrial SHMT enzymes, we evaluated if both need to be  
414 inhibited to affect proliferation of T-ALL cells. We used shRNA to knockdown *SHMT1*, *SHMT2*  
415 individually or both genes together. Repression of either *SHMT1* (Fig. 4A) or *SHMT2* (Fig. 4B)  
416 was not sufficient to impair cell proliferation. SHMT1 or SHMT2 individually were not  
417 dependencies in the CRISPR-Cas9 screening data (Supplementary Fig. 6). Instead, loss of both  
418 *SHMT1* and *SHMT2* was necessary for the full anti-proliferative effect and cell cycle arrest (Fig.  
419 4C and 4D). We also used CRISPR-Cas9 to knock out *SHMT1*, *SHMT2* or the combination,  
420 with an anti-proliferative effect observed only upon loss of both *SHMT1* and *SHMT2*, and this  
421 effect rescued by formate supplementation (Fig. 4E).

422

#### 423 **SHMT inhibition has *in vivo* efficacy in T-ALL.**

424 In order to study the effects of SHMT1 and SHMT2 suppression after the development of  
425 T-ALL *in vivo*, we deployed a doxycycline-inducible shRNA system directed against SHMT1 and  
426 SHMT2 using the two constructs that yielded efficient suppression of these genes *in vitro*  
427 (Fig.4D). RPMI8402 cells bearing the doxycycline-inducible shRNA directed against SHMT1,  
428 SHMT2 or the combination were injected into NSG mice. Leukemia establishment was  
429 confirmed by hCD45 detection in peripheral blood, and then mice were treated with doxycycline  
430 for 9 days until disease progression. Cells induced for loss of SHMT1 (or associated control)  
431 become GFP+, while induction of SHMT2 (or its control) results in DsRed expression (Fig. 5A).  
432 At time of disease evaluation, we selected hCD45+ cells that were GFP+ and dsRed+ by flow  
433 cytometry (Fig. 5B). Suppression of both SHMT1 and SHMT2 led to a competitive  
434 disadvantage, with a decrease in these double knockdown cells compared to controls (Fig. 5C).

435 RZ-2994 was reported to have limited stability in liver microsome assays<sup>19</sup>, though  
436 related pyrazolopyrans have shown modest efficacy *in vivo* for malaria treatment with oral

437 dosing<sup>18</sup>. We thus performed pharmacokinetic analysis of RZ-2994 to assess its bioavailability  
438 for use as a tool compound *in vivo*. After injection of RZ-2994 20 mg/kg IP (intraperitoneally),  
439 serial levels were measured, with a  $t_{1/2}$ =5.9 hours and drug levels shown in Figure 5D. We next  
440 performed a dose escalation study, where NSG mice were treated with up to 100 mg/kg without  
441 toxicity for 1 week. We next conducted a pilot experiment to test whether RZ-2994 treatment  
442 results in predicted metabolic changes in an orthotopic RPMI8402 mouse model, with RZ-2994  
443 dosed at 100 mg/kg IP daily. Three mice per group were treated for 1 week and selected  
444 metabolites profiled. In line with the *in vitro* data, RZ-2994 led to a trend toward increased GAR  
445 and dUMP, and an increase in the dUMP/dTMP ratio, consistent with disrupting one-carbon  
446 folate metabolism *in vivo* (Fig. 5E).

447 We next investigated the *in vivo* efficacy of RZ-2994 in a T-ALL animal model.  
448 Luciferase expressing RPMI8402 cells were injected via tail vein into irradiated NSG mice.  
449 Leukemia establishment was determined using bioluminescent imaging, and mice were  
450 randomized into two groups, vehicle versus RZ-2994 treatment once disease was established.  
451 Mice were treated with 100 mg/kg IP daily for 2 weeks and disease burden evaluated. The drug  
452 was well tolerated, with stable weights for both the vehicle and treatment cohorts (Fig. 5F). RZ-  
453 2994 treatment led to a decrease in leukemia burden in the bone marrow and spleen (Fig. 5G),  
454 supporting further compound optimization and pre-clinical evaluation of this pathway in T-ALL.

455

#### 456 **SHMT inhibition is efficacious in the setting of methotrexate resistance.**

457 Methotrexate is a backbone of ALL chemotherapy treatment. Although testing of  
458 methotrexate sensitivity is not done routinely, ALL at the time of relapse has been shown to be  
459 relatively methotrexate resistant<sup>48,49</sup>. Although highly effective in upfront therapy, inhibitors of the  
460 one-carbon folate pathway are not typically used at the time of relapse. We thus addressed  
461 whether targeting of SHMT1 and SHMT2 with RZ-2994 can be effective in the setting of  
462 methotrexate resistance. We developed methotrexate resistant cell lines by growing PF382 and

463 KOPTK1 cell lines in increasing concentrations of methotrexate over several months and found  
464 methotrexate resistant cell lines remained sensitive to RZ-2994 (Fig. 6A and 6B).

465 Targeting a pathway at two different nodes can be clinically efficacious as demonstrated  
466 using the combination of methotrexate with mercaptopurine for treatment of ALL. We thus  
467 tested the combination of methotrexate with RZ-2994. We treated the PF382, KOPTK1,  
468 RPMI8402 and HSB2 cells with RZ-2994 in combination with methotrexate concurrently across  
469 a range of drug concentrations in a serially 2-fold dilution. Cells were treated in 384-well format  
470 in quadruplicate for each drug concentration combination and viability was assessed after 3 and  
471 6 days of treatment using the CellTiter-Glo ATP-based assay. We used the Bliss independence  
472 model to assess for synergy. Based on this model, we observed a mixed response. The  
473 combination of RZ-2994 with methotrexate was antagonistic at the highest concentration of  
474 methotrexate, including around the  $IC_{50}$ , but showed synergy at lower concentrations of  
475 methotrexate (Fig.6C). Given this mixed concentration-dependent response, caution would be  
476 needed in bringing this combination into a clinical setting.

477

## 478 **Discussion**

479 Despite significant progress in the treatment of pediatric ALL since the 1950s, leukemia  
480 still accounts for the second leading cause of cancer-related death in children. For pediatric and  
481 adult patients with relapsed T-ALL, treatment options are limited, with disease often resistant to  
482 chemotherapy at the time of relapse. Thus, alternative therapies are needed.

483 In this study, we identified the one-carbon folate pathway as an enriched pathway  
484 dependency in T-ALL. One-carbon folate metabolism is critical for nucleotide synthesis, support  
485 of cellular methylation reactions via methionine and s-adenosyl methionine (SAM) production,  
486 redox regulation and support of lipid metabolism<sup>3</sup>. The role of one-carbon folate metabolism in  
487 the mitochondrial compartment, and its potential contribution to cancer metabolic  
488 reprogramming, has only recently come to light with the discovery of a role for glycine, serine,

489 and glutamine in oncogenesis<sup>46,50-52</sup>. Although cytoplasmic components of the one-carbon folate  
490 pathway have long been targeted for cancer therapy, classically with drugs such as  
491 methotrexate and mercaptopurine, targeting the mitochondrial proteins of this pathway has not  
492 been explored. Two such mitochondrial proteins, NAD-dependent mitochondrial  
493 methylenetetrahydrofolate dehydrogenase/cyclohydrolase (MTHFD2) and serine  
494 hydroxymethyltransferase 2 (SHMT2), are among the most differentially expressed metabolic  
495 enzymes in cancer cells compared to normal cells<sup>53,54</sup>. Both MTHFD2 and SHMT2  
496 overexpression have been associated with tumor pathogenesis and poor survival<sup>46,55,56</sup>.

497         Although acute leukemia is highly proliferative, the effect of one-carbon folate pathway  
498 inhibition using a novel inhibitor of SHMT1 and SHMT2, RZ-2994, was greater in T-ALL  
499 compared to AML and B-ALL. Over 70% of T-ALL have mutations leading to activation of  
500 NOTCH1 signaling, and this is associated with MYC overexpression. MYC controls a number of  
501 critical metabolic processes, including the one-carbon folate pathway. In fact, inhibition of  
502 SHMT1 and SHMT2 recapitulated gene expression changes associated with MYC inhibition and  
503 may contribute to the differential sensitivity of T-ALL to one-carbon folate pathway inhibition.

504         The mechanistic role of SHMT1 and SHMT2 that is specific to T-ALL pathogenesis  
505 remains elusive. MTHFD2 is classically described as contributing to one-carbon unit production  
506 through conversion of serine to glycine by SHMT2 and production of formate as a product of  
507 MTHFD2 and MTHFD1L activity. The cytoplasmic arm of this pathway relies on SHMT1 and can  
508 also produce glycine and formate<sup>47</sup> intermediates contributing to the synthesis of  
509 purines/pyrimidines, as well as to the methionine and glutathione cycles. The direction of one-  
510 carbon and electron flow through this pathway, and the contribution of the cytoplasmic versus  
511 mitochondrial pathways, have been debated and may be different in normal compared to cancer  
512 cells and under variable nutrient conditions<sup>47,54</sup>. In T-ALL cell lines, formate supplementation  
513 rescued the effects of dual SHMT1/SHMT2 inhibition, as well as the anti-proliferative effect of  
514 combined SHMT1/SHMT2 knockdown. This contrasts with data in DLBCL, where a defect in

515 exogenous glycine import affects the formate's ability to rescue the effects of SHMT inhibition<sup>19</sup>.  
516 Interestingly, there was no depletion of SAM and methionine with RZ-2994 treatment  
517 (Supplementary Fig. 5). Maddocks et al. showed that the one-carbon folate pathway does not  
518 contribute one-carbon units to methionine in the presence of methionine replete conditions in  
519 cells in culture<sup>57</sup>, likely explaining the lack of methionine depletion in RZ-2994 treated cells.

520 Chemotherapy resistance is a key factor in cancer treatment failure. Inhibitors of the  
521 one-carbon folate pathway are used for treatment of cancers including ALL, osteosarcoma,  
522 breast, lung and many others, though predictors of response are not evaluated pre-treatment.  
523 We showed that T-ALL cell lines that are resistant to methotrexate remain sensitive to another  
524 inhibitor of the one-carbon folate pathway. It is also possible that resistance to inhibition of the  
525 one-carbon folate pathway may be overcome with novel inhibitors of this pathway though further  
526 *in vivo* testing is necessary.

527 RZ-2994, a recently developed inhibitor of SHMT1 and SHMT2, was reported to have  
528 poor stability in liver microsome assays<sup>19</sup>. We performed a PK study, however, that showed a  
529  $t_{1/2}$ =5.9 hours. Further optimization to increase *in vivo* stability and prolong target engagement is  
530 likely necessary for improved *in vivo* efficacy. In addition, RZ-2994 causes cell cycle arrest.  
531 Active drug combinations with an SHMT1/2 inhibitor with other drugs that cause cell death may  
532 be necessary to maximize efficacy of this approach. Often new drugs are combined with  
533 standard chemotherapy for treatment of patients with leukemia. However, the combination of  
534 RZ-2994 with standard chemotherapy, which is most toxic to rapidly proliferating cells, may be  
535 antagonistic and careful testing of combinations will be necessary for clinical implementation of  
536 an optimized inhibitor.

537 In summary, the combination of unbiased genome-wide screening identifying the one-  
538 carbon folate pathway as a dependency in T-ALL, as well as the preclinical efficacy of SHMT1  
539 and SHMT2 inhibition using both chemical and genetic approaches, support further optimization  
540 of SHMT1/2 inhibitors. Given the efficacy of other one-carbon folate pathway targeting drugs in

541 cancer, novel inhibitors of this pathway are likely to be effective in other disease types, both at  
542 the time of diagnosis as well as at the time of relapse and development of drug resistance.

543

#### 544 **Acknowledgements**

545 We would like to thank Adam Friedman, Nello Mainolfi, Vipin Suri and Mark Manfredi of Raze  
546 Therapeutics for providing RZ-2994. This research was supported with grants from a Rally  
547 Foundation/Bear Necessities Collaborative Grant (KS), National Cancer Institute R35  
548 CA210030 (KS), K08 CA222684 (YP), F31 CA236036 (FFD), R35 CA242379 (MGVH), Hyundai  
549 Hope on Wheels grant (YP), AIRC (n. 17107, GR), Cubans Curing Children's Cancers (4C's  
550 Fund) (KS), Children's Leukemia Research Association (KS) and When Everyone Survives  
551 (KS). AP receives support from the ERC Starting program (758848) and is supported by the St.  
552 Louis Association for leukemia research. M.G.V.H. also acknowledges support from the MIT  
553 Center for Precision Cancer Medicine, the Ludwig Center at MIT, SU2C, and a faculty scholars  
554 award from HHMI.

555

556

#### 557 **Competing interests**

558 K.S. has previously consulted for Novartis and Rigel Pharmaceuticals and received grant  
559 funding from Novartis on topics unrelated to this manuscript. M.G.V.H. discloses that he is a  
560 consultant and advisory board member for Agios Pharmaceuticals, Aeglea Biotherapeutics,  
561 iTEOS, and Auron Therapeutics.

562

#### 563 **References**

564 1. Warburg, O., Wind, F. & Negelein, E. THE METABOLISM OF TUMORS IN THE BODY.  
565 *The Journal of General Physiology* **8**, 519-530 (1927).

- 566 2. Farber, S., Diamond, L.K., Mercer, R.D., Sylvester, R.F. & Wolff, J.A. Temporary  
567 Remissions in Acute Leukemia in Children Produced by Folic Acid Antagonist, 4-  
568 Aminopteroyl-Glutamic Acid (Aminopterin). *New England Journal of Medicine* **238**, 787-  
569 793 (1948).
- 570 3. Locasale, J.W. Serine, glycine and one-carbon units: cancer metabolism in full circle.  
571 *Nature reviews. Cancer* **13**, 572-583 (2013).
- 572 4. Radtke, F., *et al.* Deficient T cell fate specification in mice with an induced inactivation of  
573 Notch1. *Immunity* **10**, 547-558 (1999).
- 574 5. Koch, U., *et al.* Delta-like 4 is the essential, nonredundant ligand for Notch1 during  
575 thymic T cell lineage commitment. *J Exp Med* **205**, 2515-2523 (2008).
- 576 6. Ron-Harel, N., *et al.* Mitochondrial Biogenesis and Proteome Remodeling Promote One-  
577 Carbon Metabolism for T Cell Activation. *Cell Metabolism* **24**, 104-117 (2016).
- 578 7. Liu, Y., *et al.* The genomic landscape of pediatric and young adult T-lineage acute  
579 lymphoblastic leukemia. *Nature Genetics* **49**, 1211-1218 (2017).
- 580 8. Sanchez-Martin, M. & Ferrando, A. The NOTCH1-MYC highway toward T-cell acute  
581 lymphoblastic leukemia. *Blood* **129**, 1124-1133 (2017).
- 582 9. Dang, C.V. MYC on the path to cancer. *Cell* **149**, 22-35 (2012).
- 583 10. Li, F., *et al.* Myc stimulates nuclearly encoded mitochondrial genes and mitochondrial  
584 biogenesis. *Molecular and cellular biology* **25**, 6225-6234 (2005).
- 585 11. Nikiforov, M.A., *et al.* A Functional Screen for Myc-Responsive Genes Reveals Serine  
586 Hydroxymethyltransferase, a Major Source of the One-Carbon Unit for Cell Metabolism.  
587 *Molecular and Cellular Biology* **22**, 5793-5800 (2002).
- 588 12. Ye, J., *et al.* Serine catabolism regulates mitochondrial redox control during hypoxia.  
589 *Cancer Discovery* **4**, 1406-1417 (2014).
- 590 13. Pikman, Y., *et al.* Targeting MTHFD2 in acute myeloid leukemia. *The Journal of*  
591 *Experimental Medicine* **213**, 1285-1306 (2016).

- 592 14. Ward, E., DeSantis, C., Robbins, A., Kohler, B. & Jemal, A. Childhood and adolescent  
593 cancer statistics, 2014. *CA: a cancer journal for clinicians* **64**, 83-103 (2014).
- 594 15. Nguyen, K., *et al.* Factors influencing survival after relapse from acute lymphoblastic  
595 leukemia: a Children's Oncology Group study. *Leukemia* **22**, 2142-2150 (2008).
- 596 16. Gaynon, P.S., *et al.* Bone marrow transplantation versus prolonged intensive  
597 chemotherapy for children with acute lymphoblastic leukemia and an initial bone marrow  
598 relapse within 12 months of the completion of primary therapy: Children's Oncology  
599 Group study CCG-1941. *Journal of Clinical Oncology: Official Journal of the American*  
600 *Society of Clinical Oncology* **24**, 3150-3156 (2006).
- 601 17. Robinson, A.D., Eich, M.L. & Varambally, S. Dysregulation of de novo nucleotide  
602 biosynthetic pathway enzymes in cancer and targeting opportunities. *Cancer Lett* **470**,  
603 134-140 (2020).
- 604 18. Schwertz, G., *et al.* Antimalarial Inhibitors Targeting Serine Hydroxymethyltransferase  
605 (SHMT) with in Vivo Efficacy and Analysis of their Binding Mode Based on X-ray  
606 Cocrystal Structures. *Journal of Medicinal Chemistry* **60**, 4840-4860 (2017).
- 607 19. Ducker, G.S., *et al.* Human SHMT inhibitors reveal defective glycine import as a  
608 targetable metabolic vulnerability of diffuse large B-cell lymphoma. *Proc Natl Acad Sci U*  
609 *S A* **114**, 11404-11409 (2017).
- 610 20. Meyers, R.M., *et al.* Computational correction of copy number effect improves specificity  
611 of CRISPR-Cas9 essentiality screens in cancer cells. *Nat Genet* **49**, 1779-1784 (2017).
- 612 21. Dempster, J.M., *et al.* Extracting Biological Insights from the Project Achilles Genome-  
613 Scale CRISPR Screens in Cancer Cell Lines. (2019).
- 614 22. Hart, T., Brown, K.R., Sircoulomb, F., Rottapel, R. & Moffat, J. Measuring error rates in  
615 genomic perturbation screens: gold standards for human functional genomics. *Mol Syst*  
616 *Biol* **10**, 733 (2014).



- 617 23. Blomen, V.A., *et al.* Gene essentiality and synthetic lethality in haploid human cells.  
618 *Science* **350**, 1092-1096 (2015).
- 619 24. Hart, T., *et al.* High-Resolution CRISPR Screens Reveal Fitness Genes and Genotype-  
620 Specific Cancer Liabilities. *Cell* **163**, 1515-1526 (2015).
- 621 25. Ritchie, M.E., *et al.* limma powers differential expression analyses for RNA-sequencing  
622 and microarray studies. *Nucleic Acids Res* **43**, e47 (2015).
- 623 26. Puissant, A., *et al.* SYK is a critical regulator of FLT3 in acute myeloid leukemia. *Cancer*  
624 *Cell* **25**, 226-242 (2014).
- 625 27. Dobin, A., *et al.* STAR: ultrafast universal RNA-seq aligner. *Bioinformatics* **29**, 15-21  
626 (2013).
- 627 28. Okonechnikov, K., Conesa, A. & Garcia-Alcalde, F. Qualimap 2: advanced multi-sample  
628 quality control for high-throughput sequencing data. *Bioinformatics* **32**, 292-294 (2016).
- 629 29. Varet, H., Brillet-Gueguen, L., Coppee, J.Y. & Dillies, M.A. SARTools: A DESeq2- and  
630 EdgeR-Based R Pipeline for Comprehensive Differential Analysis of RNA-Seq Data.  
631 *PLoS One* **11**, e0157022 (2016).
- 632 30. Liao, Y., Smyth, G.K. & Shi, W. The R package Rsubread is easier, faster, cheaper and  
633 better for alignment and quantification of RNA sequencing reads. *Nucleic Acids Res* **47**,  
634 e47 (2019).
- 635 31. Zhu, A., Ibrahim, J.G. & Love, M.I. Heavy-tailed prior distributions for sequence count  
636 data: removing the noise and preserving large differences. *Bioinformatics* **35**, 2084-2092  
637 (2019).
- 638 32. Love, M.I., Huber, W. & Anders, S. Moderated estimation of fold change and dispersion  
639 for RNA-seq data with DESeq2. *Genome Biol* **15**, 550 (2014).
- 640 33. Subramanian, A., *et al.* Gene set enrichment analysis: a knowledge-based approach for  
641 interpreting genome-wide expression profiles. *Proceedings of the National Academy of*  
642 *Sciences of the United States of America* **102**, 15545-15550 (2005).

- 643 34. Mootha, V.K., *et al.* PGC-1alpha-responsive genes involved in oxidative phosphorylation  
644 are coordinately downregulated in human diabetes. *Nature Genetics* **34**, 267-273 (2003).
- 645 35. Liberzon, A., *et al.* The Molecular Signatures Database (MSigDB) hallmark gene set  
646 collection. *Cell Syst* **1**, 417-425 (2015).
- 647 36. Liberzon, A., *et al.* Molecular signatures database (MSigDB) 3.0. *Bioinformatics* **27**,  
648 1739-1740 (2011).
- 649 37. Subramanian, A., *et al.* Gene set enrichment analysis: a knowledge-based approach for  
650 interpreting genome-wide expression profiles. *Proc Natl Acad Sci U S A* **102**, 15545-  
651 15550 (2005).
- 652 38. Barbie, D.A., *et al.* Systematic RNA interference reveals that oncogenic KRAS-driven  
653 cancers require TBK1. *Nature* **462**, 108-112 (2009).
- 654 39. Bliss, C.I. The calculation of microbial assays. *Bacteriological Reviews* **20**, 243-258  
655 (1956).
- 656 40. Greco, W.R., Bravo, G. & Parsons, J.C. The search for synergy: a critical review from a  
657 response surface perspective. *Pharmacological Reviews* **47**, 331-385 (1995).
- 658 41. Aguirre, A.J., *et al.* Genomic Copy Number Dictates a Gene-Independent Cell Response  
659 to CRISPR/Cas9 Targeting. *Cancer Discov* **6**, 914-929 (2016).
- 660 42. Zhang, J., *et al.* The genetic basis of early T-cell precursor acute lymphoblastic  
661 leukaemia. *Nature* **481**, 157-163 (2012).
- 662 43. Den Boer, M.L., *et al.* A subtype of childhood acute lymphoblastic leukaemia with poor  
663 treatment outcome: a genome-wide classification study. *Lancet Oncol* **10**, 125-134  
664 (2009).
- 665 44. Ron-Harel, N., *et al.* Mitochondrial Biogenesis and Proteome Remodeling Promote One-  
666 Carbon Metabolism for T Cell Activation. *Cell Metab* **24**, 104-117 (2016).
- 667 45. Nilsson, R., *et al.* Metabolic enzyme expression highlights a key role for MTHFD2 and  
668 the mitochondrial folate pathway in cancer. *Nature communications* **5**, 3128 (2014).

- 669 46. Jain, M., *et al.* Metabolite profiling identifies a key role for glycine in rapid cancer cell  
670 proliferation. *Science (New York, N.Y.)* **336**, 1040-1044 (2012).
- 671 47. Ducker, G.S., *et al.* Reversal of Cytosolic One-Carbon Flux Compensates for Loss of the  
672 Mitochondrial Folate Pathway. *Cell Metabolism* **23**, 1140-1153 (2016).
- 673 48. Rots, M.G., *et al.* mRNA expression levels of methotrexate resistance-related proteins in  
674 childhood leukemia as determined by a standardized competitive template-based RT-  
675 PCR method. *Leukemia* **14**, 2166-2175 (2000).
- 676 49. Rots, M.G., *et al.* Methotrexate resistance in relapsed childhood acute lymphoblastic  
677 leukaemia. *Br J Haematol* **109**, 629-634 (2000).
- 678 50. Maddocks, O.D.K., *et al.* Serine starvation induces stress and p53-dependent metabolic  
679 remodelling in cancer cells. *Nature* **493**, 542-546 (2013).
- 680 51. Willems, L., *et al.* Inhibiting glutamine uptake represents an attractive new strategy for  
681 treating acute myeloid leukemia. *Blood*, [Epub ahead of print] (2013).
- 682 52. Zhang, W.C., *et al.* Glycine decarboxylase activity drives non-small cell lung cancer  
683 tumor-initiating cells and tumorigenesis. *Cell* **148**, 259-272 (2012).
- 684 53. Yang, X.M. & MacKenzie, R.E. Expression of human NAD-dependent  
685 methylenetetrahydrofolate dehydrogenase-methenyltetrahydrofolate cyclohydrolase in  
686 *Escherichia coli*: purification and partial characterization. *Protein Expression and*  
687 *Purification* **3**, 256-262 (1992).
- 688 54. Christensen, K.E. & Mackenzie, R.E. Mitochondrial methylenetetrahydrofolate  
689 dehydrogenase, methenyltetrahydrofolate cyclohydrolase, and formyltetrahydrofolate  
690 synthetases. *Vitamins and hormones* **79**, 393-410 (2008).
- 691 55. Tedeschi, P.M., Vazquez, A., Kerrigan, J.E. & Bertino, J.R. Mitochondrial  
692 Methylenetetrahydrofolate Dehydrogenase (MTHFD2) Overexpression Is Associated  
693 with Tumor Cell Proliferation and Is a Novel Target for Drug Development. *Molecular*  
694 *cancer research: MCR* **13**, 1361-1366 (2015).

- 695 56. Lee, G.Y., *et al.* Comparative oncogenomics identifies PSMB4 and SHMT2 as potential  
696 cancer driver genes. *Cancer Research* **74**, 3114-3126 (2014).
- 697 57. Maddocks, O.D.K., Labuschagne, C.F., Adams, P.D. & Vousden, K.H. Serine  
698 Metabolism Supports the Methionine Cycle and DNA/RNA Methylation through De Novo  
699 ATP Synthesis in Cancer Cells. *Molecular Cell* **61**, 210-221 (2016).
- 700 58. Den Boer, M.L., *et al.* A subtype of childhood acute lymphoblastic leukaemia with poor  
701 treatment outcome: a genome-wide classification study. *The Lancet. Oncology* **10**, 125-  
702 134 (2009).

703

## 704 **Figure Legends**

705 **Figure 1: One-carbon folate metabolism is a dependency in T-ALL.** Volcano plots showing  
706 enrichment of KEGG pathways for 689 cell lines in the Avana 19Q4 dataset. The KEGG one-  
707 carbon pool by folate, purine metabolism and pyrimidine metabolism pathways scored as most  
708 depleted in the T-ALL lineage (n=3) compared to all other cell lines (n=686) (A) (P = 0.0003,  
709 Mann-Whitney test) and compared to other hematopoietic cell lines (n=73) (B) (P = 0.025,  
710 Mann-Whitney test). Normalized enrichment score (NES) shown on X-axis. C) Graph showing  
711 the distribution of the ssGSEA Z-scores for the one-carbon pool by folate pathway across  
712 cancer cell lineages represented in the Avana 19Q4 data set. The one-carbon pool by folate  
713 pathway is significantly enriched in T-ALL vs non-T-ALL hematopoietic (\*P < 0.05, Mann-  
714 Whitney test) and T-ALL vs solid tumor (\*\*P < 0.001, Mann-Whitney test) cell lines. D)  
715 Heatmap of ssGSEA projection for the primary ALL sample data set GSE33315 from St. Jude  
716 on the collection of KEGG canonical pathways. T-ALL samples are highlighted in red.

717

718

719 **Figure 2: Enzymatic inhibition of SHMT1 and SHMT2 results in T-ALL arrest and gene**  
720 **expression changes.** A) T-ALL (n=8), B-ALL (n=9) and AML (n=9) cell lines were treated with

721 RZ-2994 in a range of concentrations, in quadruplicate for 6 days. Bar graph showing the  
722 average  $IC_{50}$  per lineage, with each dot representing the  $IC_{50}$  in a cell line. \* $P < 0.05$  and  
723 \*\*\* $P < 0.001$  using a Mann-Whitney test. B) Cell cycle analysis in T-ALL cells treated with  
724 increasing concentrations of RZ-2994. C) Bar graph showing percent Annexin V positive cells  
725 with increasing concentrations of RZ-2994 in T-ALL cell lines. Shown are the mean  $\pm$  standard  
726 deviation (SD) of 3 replicates. RNAseq was performed for the KOPTK1 cell line treated with RZ-  
727 2994. Volcano plots showing quantitative comparison of gene sets from MSigDB v7.0 using  
728 ssGSEA. Volcano plots compare DMSO versus RZ-2994 after 3 days of treatment. All datasets  
729 above the dashed red line have  $P$ -value  $\leq 0.05$ . Gene expression changes associated with 3-  
730 day RZ-2994 treatment show enrichment for D) amino acid metabolism, E) MYC targets and F)  
731 cell cycle pathways. Top scoring GSEA plots are shown below the associated volcano plots.

732

733 **Figure 3: RZ-2994 causes metabolic changes in T-ALL, and its antiproliferative effects**  
734 **can be rescued with formate supplementation.** A) Heatmaps showing changes in  
735 metabolites associated with one-carbon folate metabolism following treatment with RZ-2994 in 3  
736 cell lines. Cell lines were treated with 2  $\mu$ M RZ-2994 for 3 days, metabolites extracted and  
737 profiled using LC-MS. Raw peak areas were normalized to internal standards. Heatmap shows  
738 normalization of the relative metabolite abundance per metabolite. B) RZ-2994 leads to a  
739 decreased cell growth in T-ALL cell lines, and this growth defect can be rescued with  
740 supplementation of 1 mM formate. Graphs depict cell number as measured by trypan blue  
741 exclusion. Shown are the means  $\pm$ SD of 3 replicates. C) Cell cycle analysis in T-ALL cells  
742 treated with DMSO, RZ-2994 (2  $\mu$ M), formate (1 mM) or the combination of RZ-2994 with  
743 formate. D) T-ALL cell lines were grown in a range of RZ-2994 concentrations, in regular media  
744 or supplemented with 1 mM formate, and viability evaluated at day 6 by an ATP-based assay as  
745 the percentage of viable cells relative to a DMSO control. Shown are the mean  $\pm$  standard  
746 deviation (SD) of 4 replicates.

747

748 **Figure 4: Loss of both SHMT1 and SHMT2 is required for T-ALL cell cycle arrest. A)**

749 Western blot evaluating knockdown of SHMT1 in a PF382 cell line with five unique doxycycline-

750 inducible shRNAs (shSHMT1-1, shSHMT1-2, shSHMT1-3, shSHMT1-4 and shSHMT1-5)

751 compared to a control shRNA (shControl). Vinculin is used as a loading control. Cells were

752 grown over the course of 6 days and viability assessed by an ATP-based assay. Graphs depict

753 luminescence fold change per cell line condition relative to Day 0. Shown are the means  $\pm$ SD of

754 4 replicates. B) Western blot evaluating knockdown of SHMT2 in the PF382 cell line with four

755 unique doxycycline-inducible shRNAs (shSHMT2-1, shSHMT2-2, shSHMT2-3 and shSHMT2-5)

756 compared to a control shRNA (shControl). Vinculin is used as a loading control. Cells were

757 grown over the course of 6 days and viability assessed by an ATP-based assay. Graphs depict

758 luminescence fold change per cell line condition relative to Day 0. Shown are the means  $\pm$ SD of

759 4 replicates. We used a combination of SHMT1 and SHMT2 targeting hairpins to knockdown

760 SHMT1, SHMT2 or both in PF382 cells (C) or RPMI8402 cells (D). Western blot showing

761 knockdown using shSHMT1-1 or shSHMT1-2 (labeled 1 or 2 in the SHMT1 row), or shSHMT2-2

762 or shSHMT2-3 (labeled 2 or 3 in the SHMT2 row). Addition of shControl vectors shown with +.

763 Cells were grown over the course of 6 days and viability assessed by an ATP-based assay.

764 Graphs depict luminescence fold change per cell line condition relative to Day 0. shSHMT2-2

765 and shSHMT2-3 are both labeled “shSHMT2” and colored grey. shSHMT1-1 and shSHMT1-2

766 are both labeled “shSHMT1” and colored blue. Cells with knockdown of both SHMT1 and

767 SHMT2 are shown in red. Shown are the means  $\pm$ SD of 4 replicates. Bar graph showing cell

768 cycle analysis in cells after inducible shRNA knockdown. E) Western blot showing knockout of

769 *SHMT1*, *SHMT2* or both using CRISPR guides. Cells were grown over the course of 6 days and

770 viability assessed by an ATP-based assay. Graphs depict luminescence fold change per cell

771 line condition relative to Day 0.

772

773 **Figure 5: Knockdown and enzymatic inhibition of SHMT1 and SHMT2 are effective for T-**  
774 **ALL therapy *in vivo*.** A) Schematic showing SHMT1 and SHMT2 targeting doxycycline  
775 inducible constructs which were used for the cell line and mouse experiments. B) Sample flow  
776 plot showing schema for cell selection with both SHMT1 and SHMT2 hairpins (or associated  
777 controls) for the *in vivo* study. C) Bar graph depicting percent of triple positive (hCD45+, GFP+  
778 and dsRed+) cells in bone marrow and spleen. Shown is average with SD, n=7 per group.  
779 \*P<0.05, \*\*\*P<0.001 using Mann-Whitney test. D) Graph showing blood RZ-2994  
780 concentrations over time after a single dose of 20 mg/kg IP. Shown is the average  $\pm$  SD, n=3  
781 per group. E) Polar metabolites were extracted from spleens of mice treated with RZ-2994 for 1  
782 week and targeted profiling done using LC-MS. Bar graph shows relative metabolites compared  
783 to internal controls. Shown is average with SD, n=4 for vehicle samples, and n=3 for RZ-2994  
784 samples. F) Irradiated NSG mice were injected with RPMI8402-lucNeo cells. After disease was  
785 established, mice were treated with RZ-2994. Graph showing weights relative to Day 0 of  
786 treatment. Shown is average with SD, n=7 per group. After 2 weeks of treatment, leukemia  
787 burden was assessed. G) Bar graph showing percent of hCD45+ cells in bone marrow and  
788 spleen after treatment with RZ-2994 100 mg/kg for 2 weeks. \*P<0.05, \*\*\*P<0.001 using Mann-  
789 Whitney test.

790

791 **Figure 6: RZ-2994 is effective in the setting of methotrexate resistance.** PF382 (A) and  
792 KOPTK1 (B) cells were grown to methotrexate resistance and then tested for sensitivity to RZ-  
793 2994. Parental and methotrexate resistant cells were tested with a range of RZ-2994  
794 concentrations and viability evaluated at day 6 by an ATP-based assay as the percentage of  
795 viable cells relative to a DMSO control. Shown are the mean  $\pm$  standard deviation (SD) of 4  
796 replicates. (C) Excess over Bliss analysis for the combination of RZ-2994 with methotrexate in  
797 PF382, KOPTK1, RPMI8402 and HSB2 cells treated for 6 days in replicates of 4.

798

799 **Supplementary Figure Legends**

800 **Supplementary Figure 1:** Graphs showing distribution of the ssGSEA Z-scores for the purine  
801 and pyrimidine metabolism pathways across cancer cell lineages represented in the Avana  
802 19Q4 data set. A) The purine metabolism pathway is significantly enriched in T-ALL vs non-T-  
803 ALL hematopoietic (\*\*P < 0.01, Mann-Whitney test) and T-ALL vs solid tumor (\*\*\*P < 0.001,  
804 Mann-Whitney test). B) The pyrimidine metabolism pathway is significantly enriched in T-ALL vs  
805 non-T-ALL hematopoietic (\*\*\*P < 0.001, Mann-Whitney test) and T-ALL vs solid tumor (\*\*\*P <  
806 0.001, Mann-Whitney test).

807  
808 **Supplementary Figure 2:** A) Heatmap of ssGSEA projection for the primary ALL dataset from  
809 Den Boer et al.<sup>58</sup> on the collection of KEGG canonical pathways. T-ALL samples are highlighted  
810 in red. Graphs showing the distribution of the ssGSEA Z-scores for the one-carbon folate  
811 pathway in the GSE33315 (B) and GSE13351 (C) data sets (\*\*\*P<0.001, Mann-Whitney test).

812  
813 **Supplementary Figure 3:** Cell cycle analysis in T-ALL cells treated with increasing  
814 concentrations of RZ-2994.

815  
816 **Supplementary Figure 4:** RNAseq was performed for KOPTK1 cell line treated with RZ-2994.  
817 Volcano plots showing quantitative comparison of gene sets from MSigDB v7.0 using ssGSEA.  
818 Volcano plots compare DMSO versus RZ-2994 after 1 day of treatment. All datasets above  
819 dashed red line have P-value  $\leq$  0.05. Gene expression changes associated with 1-day RZ-2994  
820 treatment show enrichment for A) amino acid metabolism, B) MYC targets and C) cell cycle  
821 pathways. Top scoring GSEA plots are shown below the associated volcano plots.

822  
823 **Supplementary Figure 5:** Heatmaps showing metabolites that were significantly changed with  
824 RZ-2994 treatment across 3 cell lines. Cell lines were treated with 2  $\mu$ M RZ-2994 for 3 days,



825 metabolites extracted and profiled using LC-MS. Raw peak areas were normalized to internal  
826 standards. Heatmap shows normalization of the relative metabolite abundance per metabolite.

827

828 **Supplementary Figure 6:** Volcano plots showing effect size for *SHMT1* or *SHMT2* knockout in  
829 689 cell lines in the Avana 19Q4 dataset. The differential dependency gene level scores for the  
830 T-ALL lineage were determined for T-ALL vs. all other non T-ALL cell lines (A), and also for T-  
831 ALL vs. all other non T-ALL hematopoietic cell lines (B), in order to eliminate the bias induced  
832 by the hematopoietic lineage. C) Graph showing CERES dependency score for *SHMT1*  
833 knockout in 689 cancer cell lines screened as part of the Avana 19Q4 data set. T-ALL cell lines  
834 are indicated in red. Dotted lines signify level of significant dependency (CERES score < -0.5) or  
835 proliferative advantage (CERES score > 0.5). D) Graph showing CERES dependency score for  
836 *SHMT2* knockout in 689 cancer cell lines screened as part of the Avana 19Q4 data set. T-ALL  
837 cell lines are indicated in red.

838

839

840

841

842

**A**

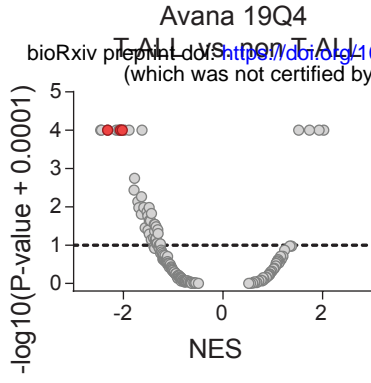

**B**

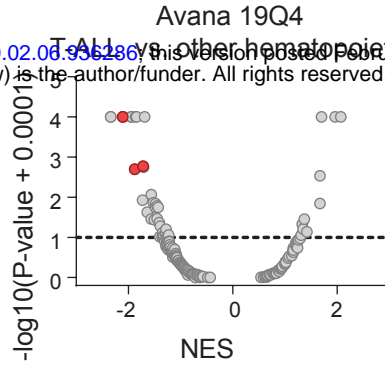

● IC folate, purine and pyrimidine metabolism  
 ● Others

**C**

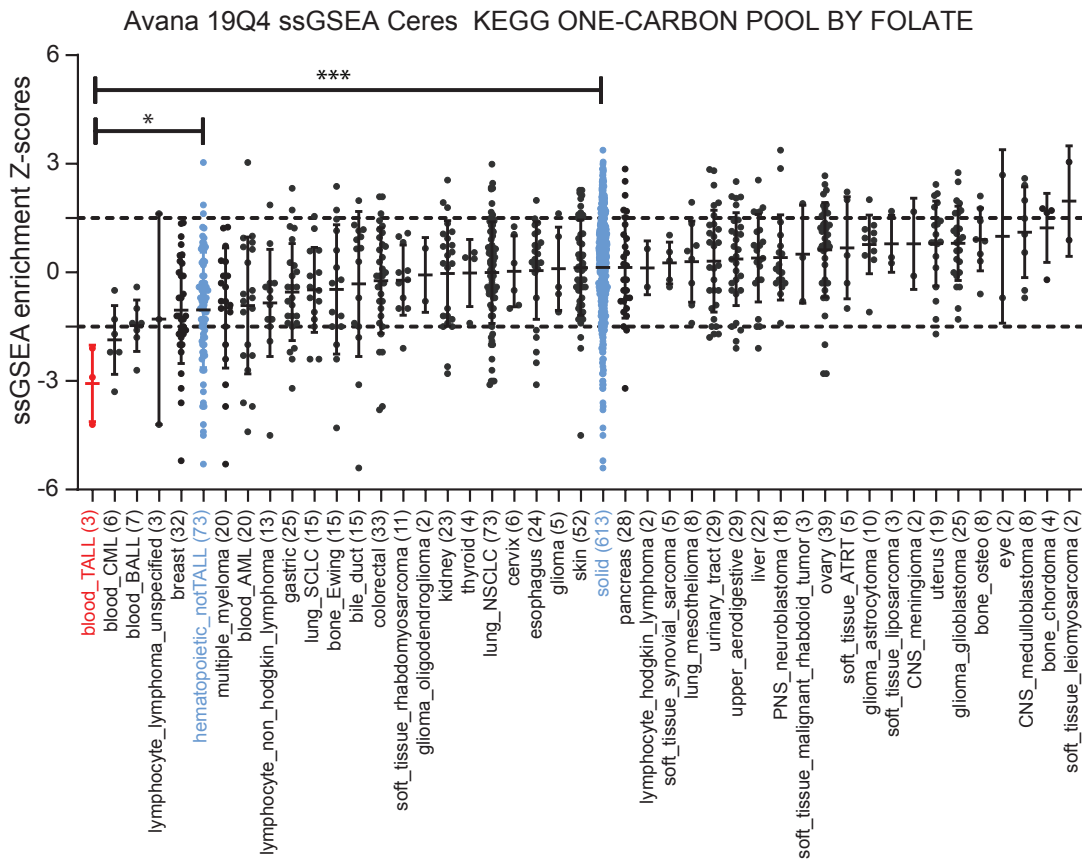

**D**

GSE33315 Zhang et al 566 ALL samples

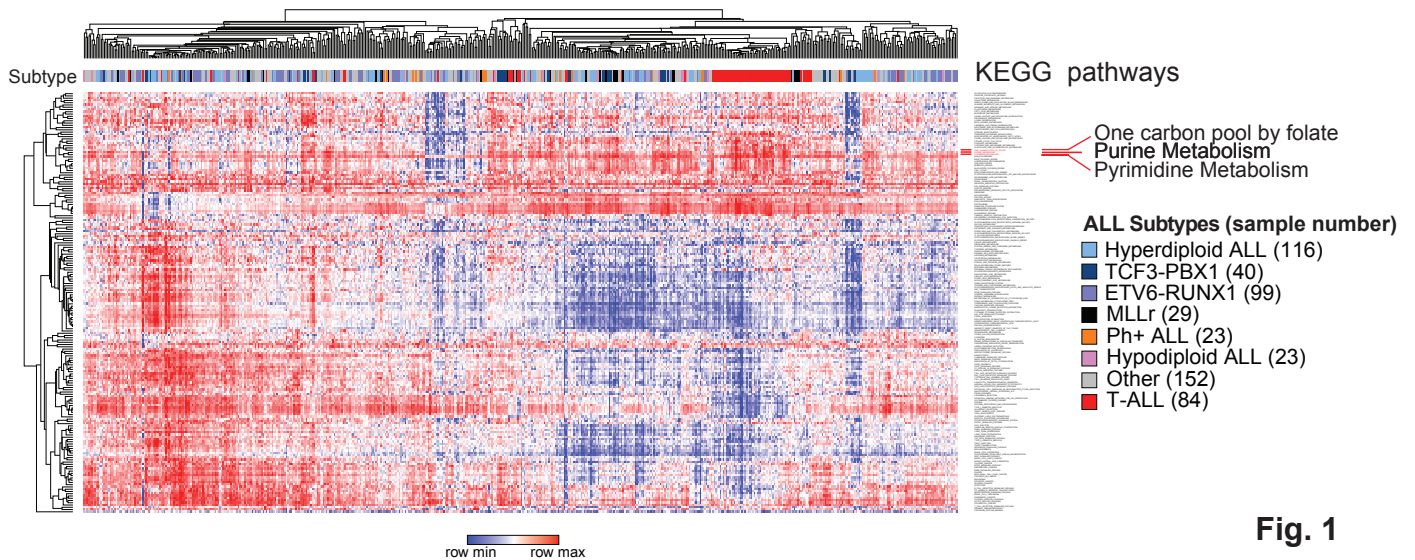

**Fig. 1**

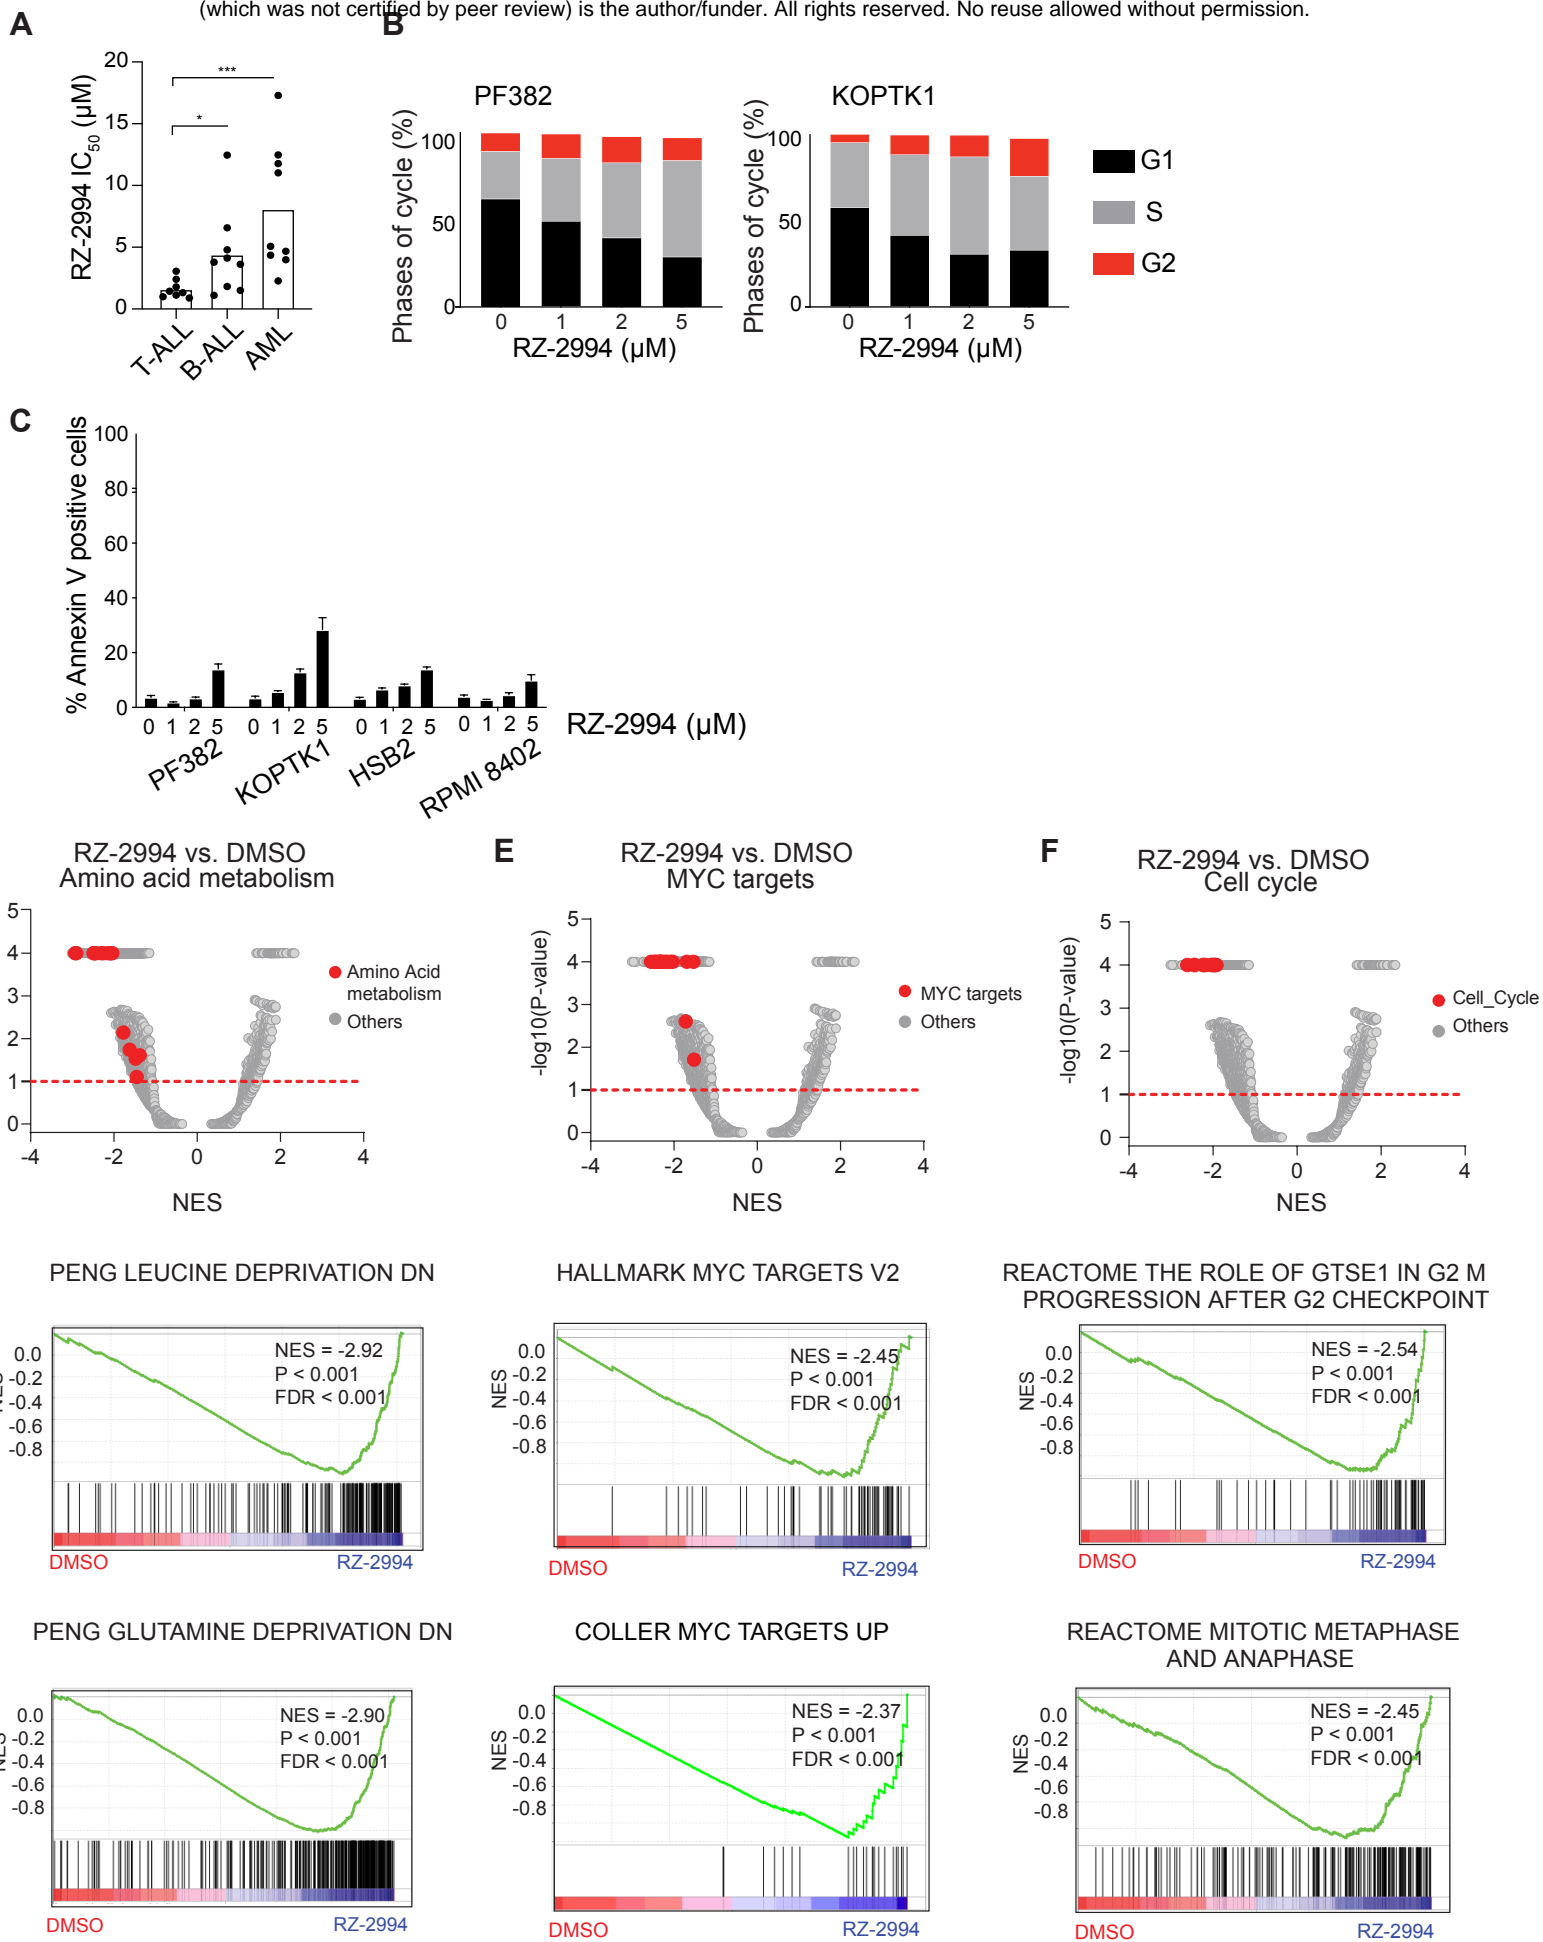

**Fig. 2**

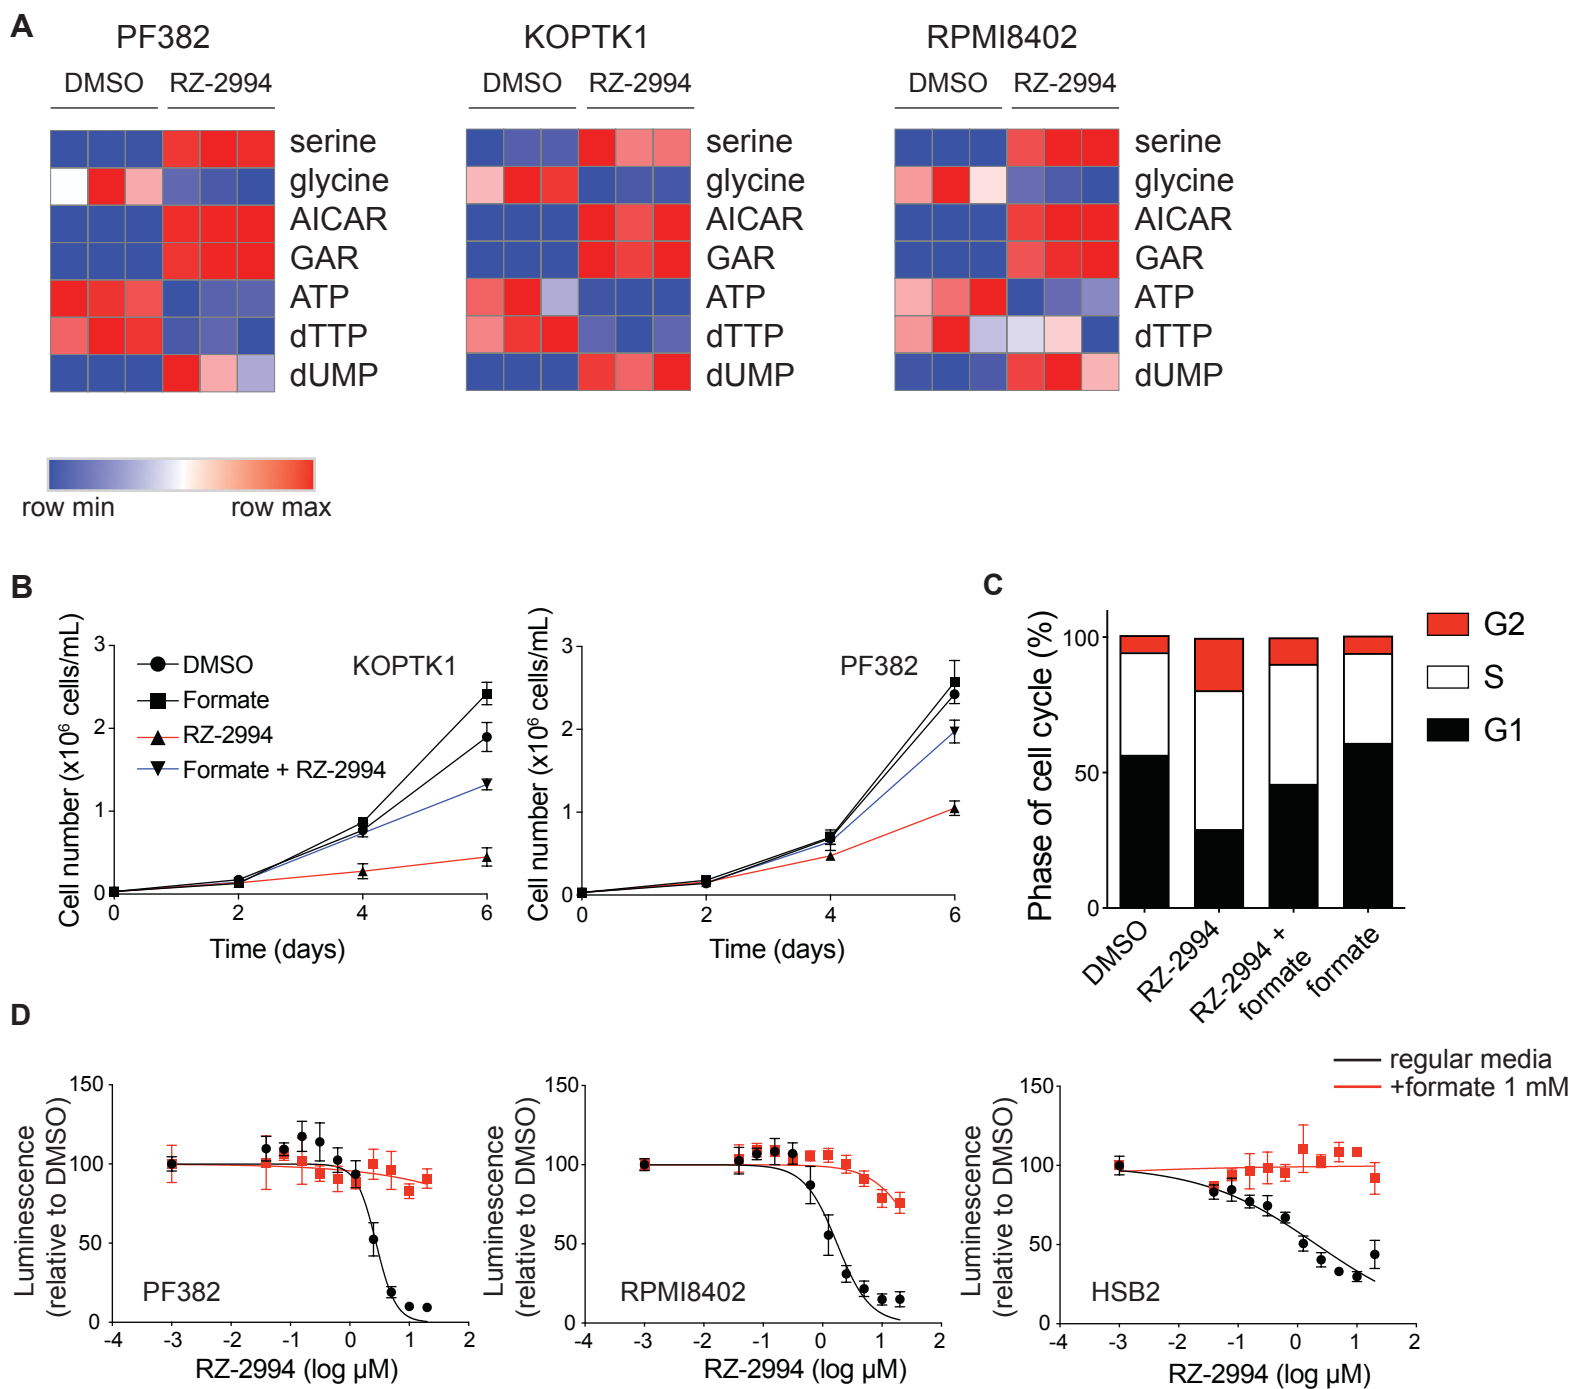

**Fig. 3**

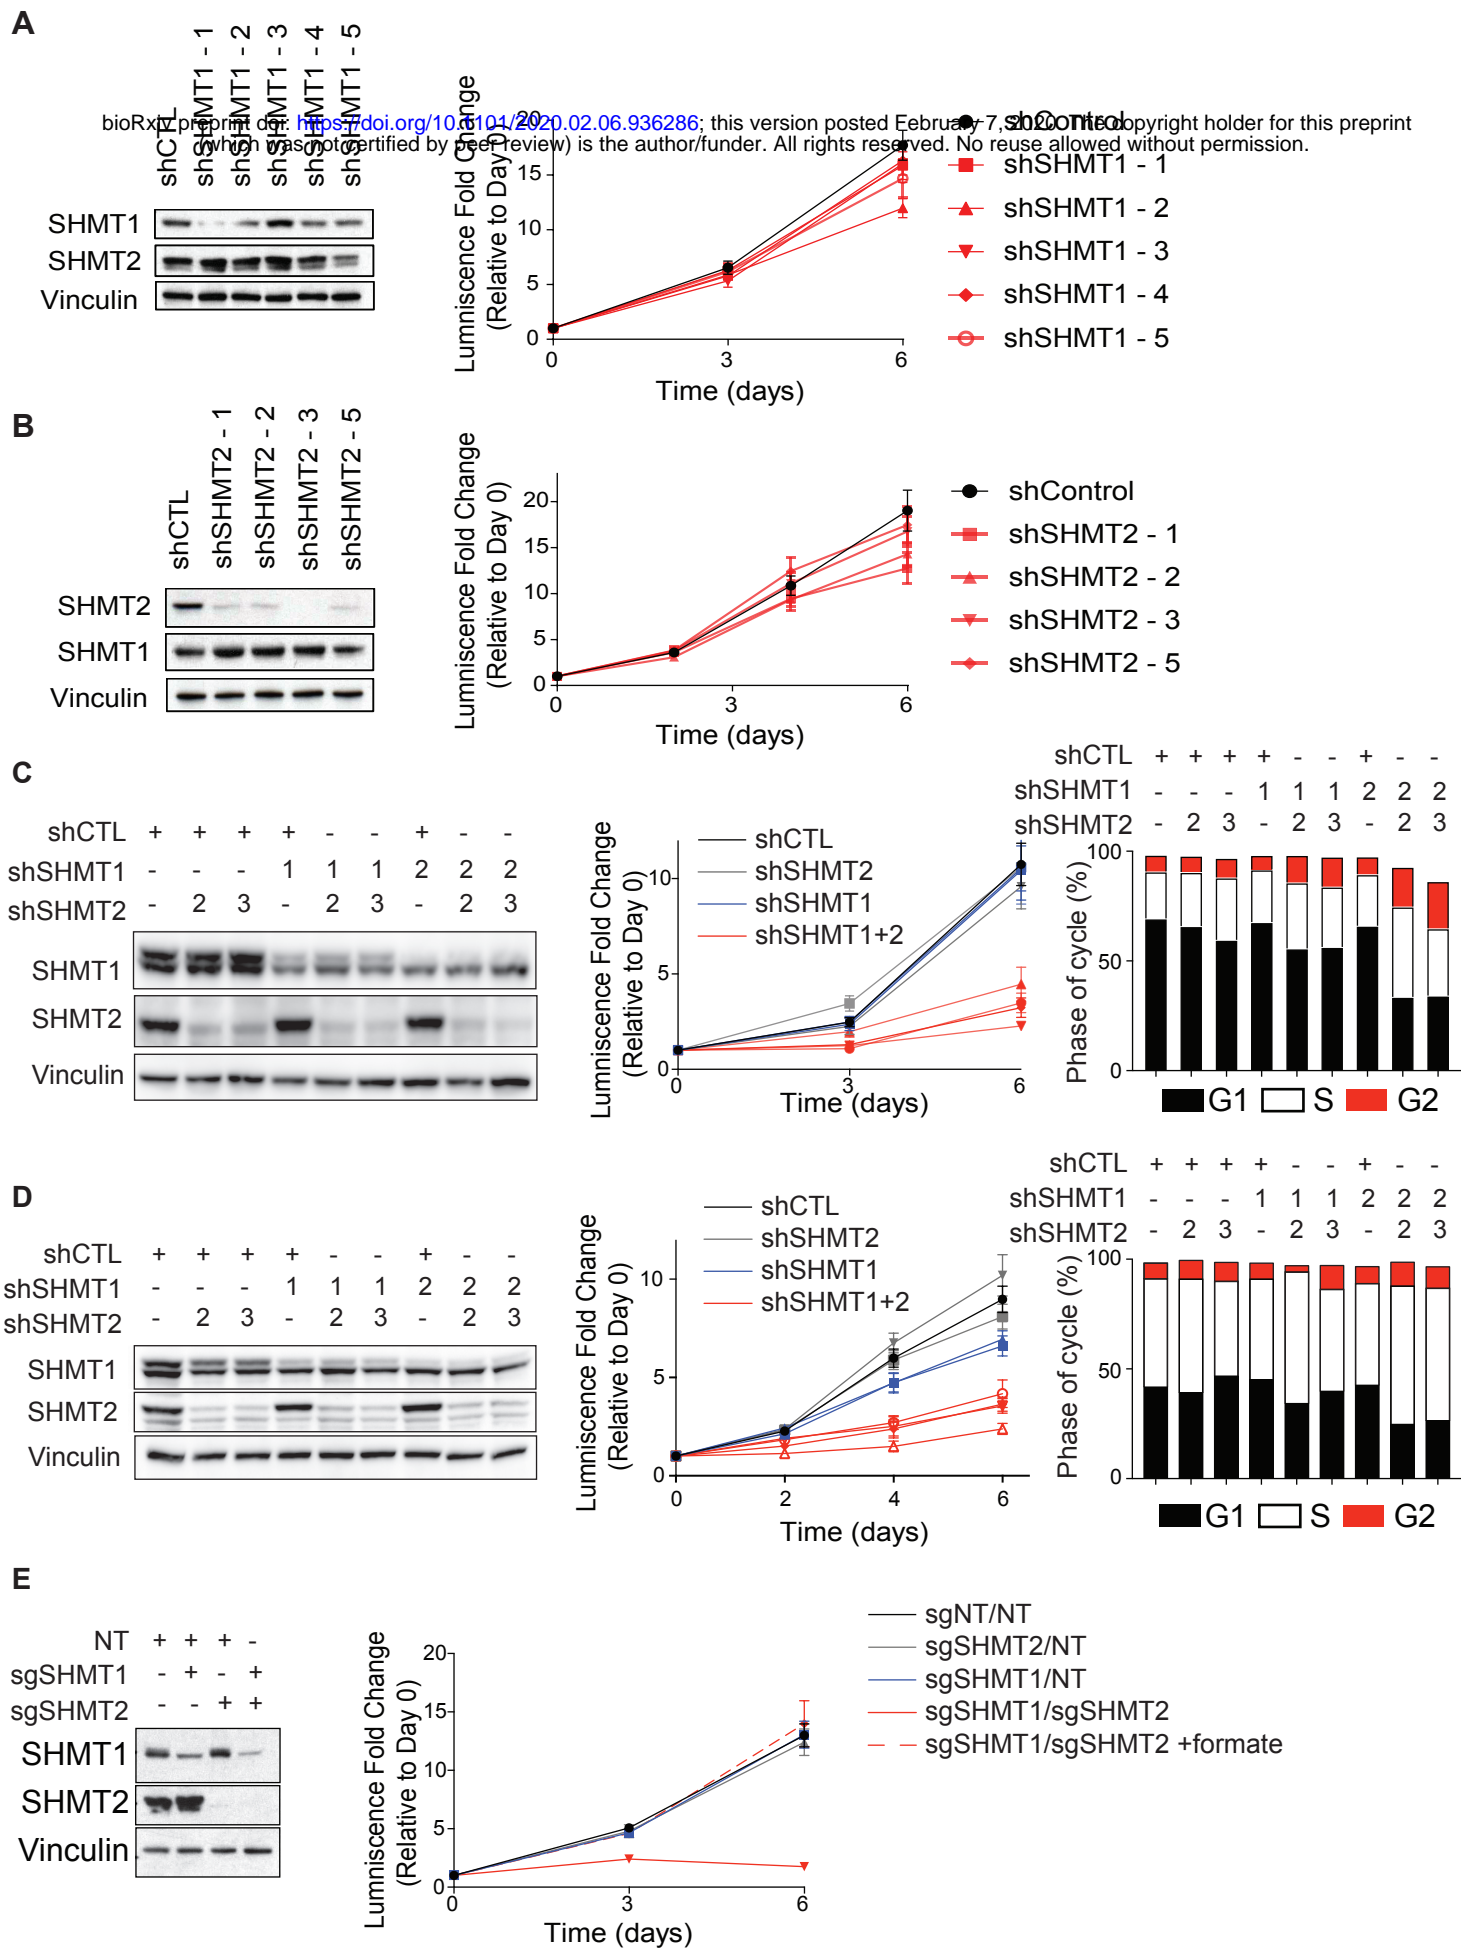

**Fig. 4**

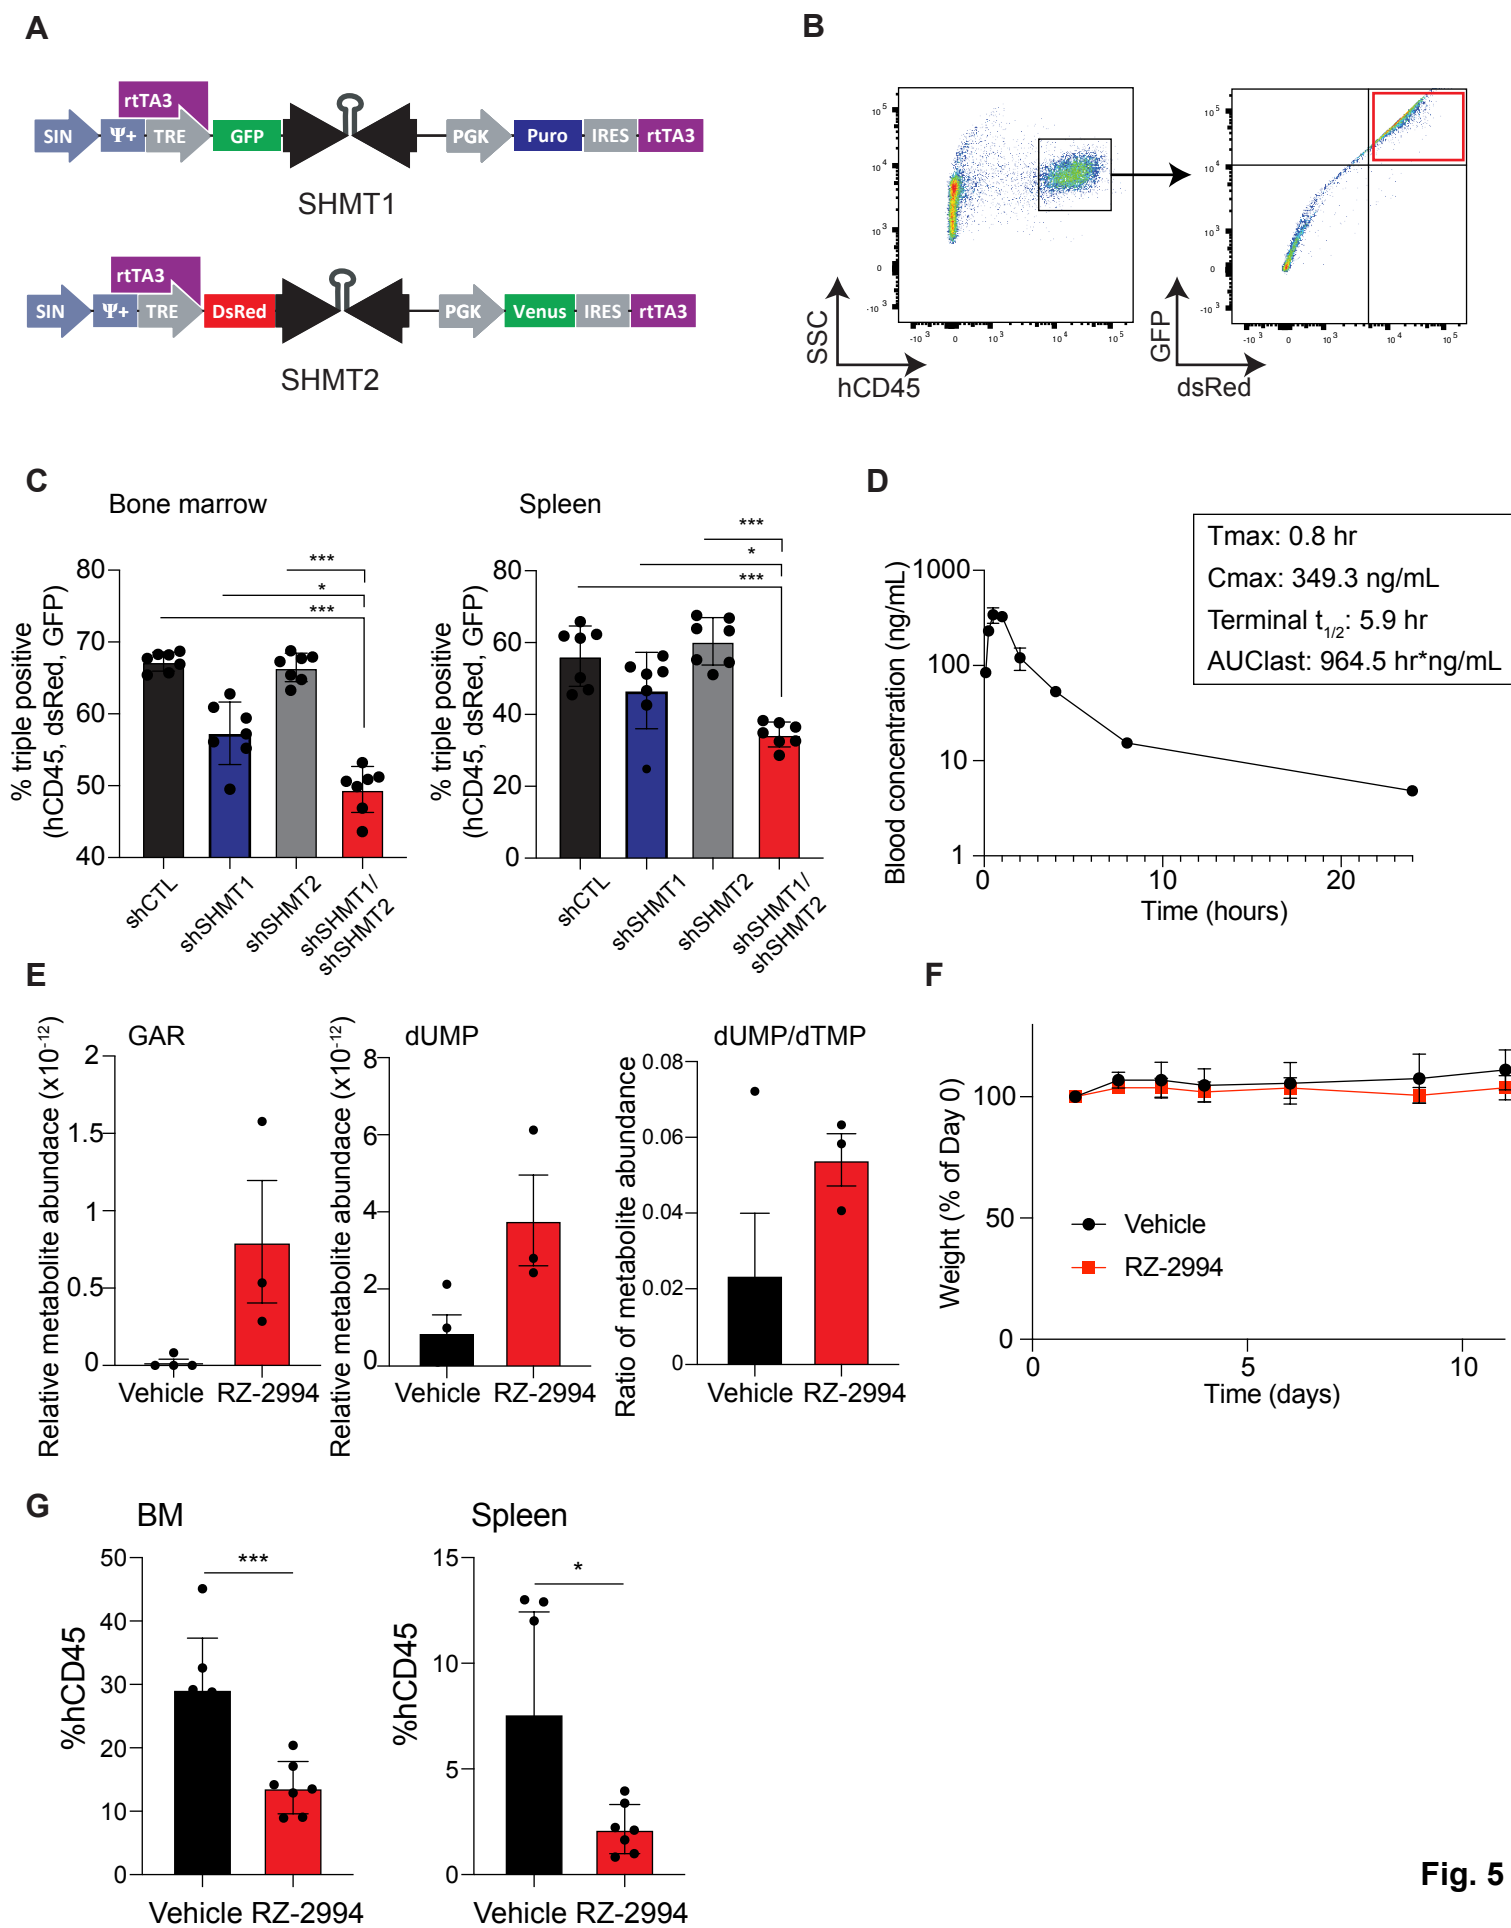

**Fig. 5**

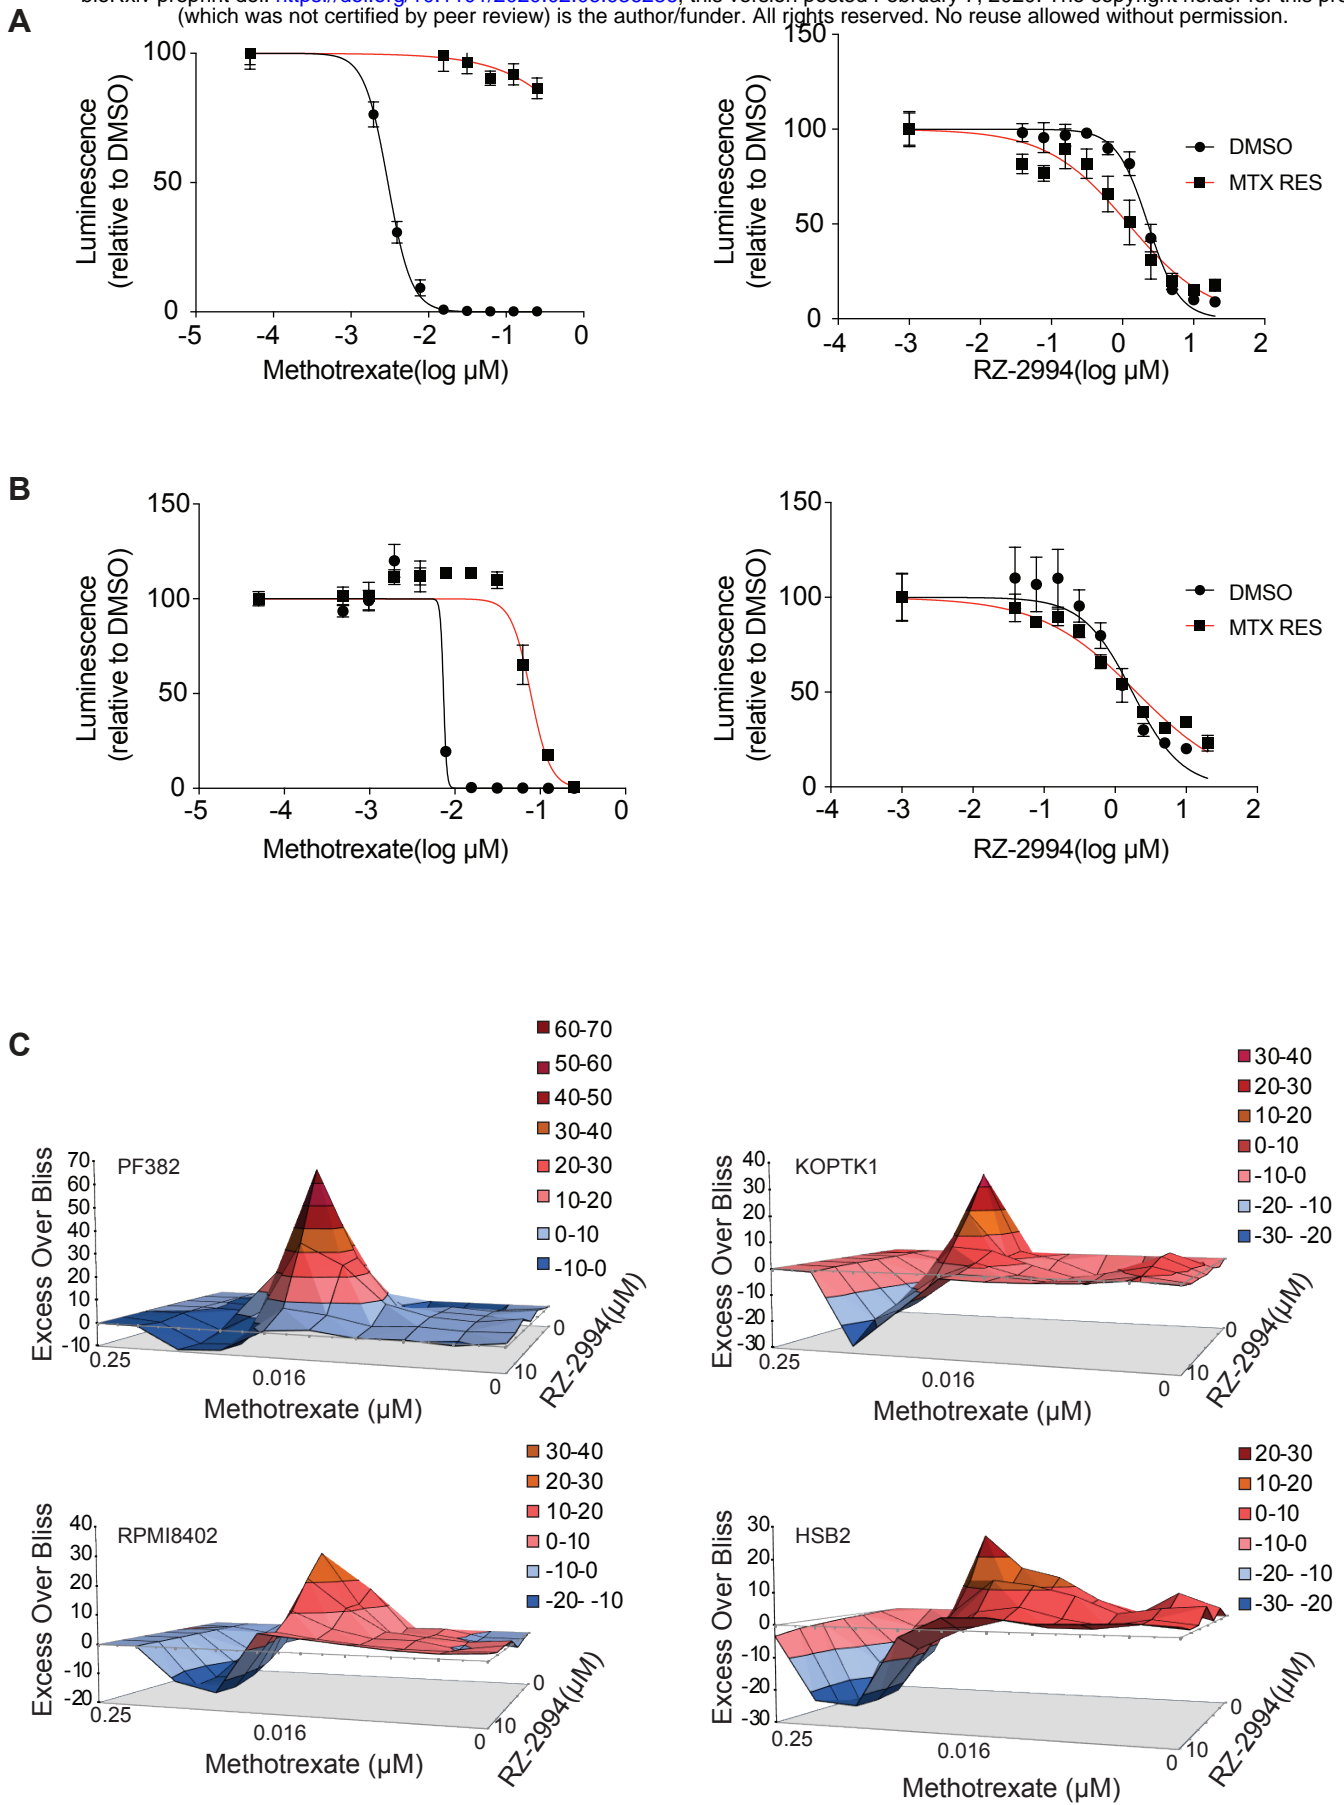

**Fig. 6**
